# Supplementary material for: Workflow for fast lipid tissue screening using LESA-FT-ICR-MS
Source: Royal Society of Chemistry journal article supplement (doi:10.1039/c8ay02739k), 2019-01-01
Supplement: c8ay02739k1.xlsx [file c8ay02739k1.xlsx]

## Sheet: TableSI1_MB_pos_non-unique
Precursor m/z	species	Chemical Composition	Short Name	Theo. m/z	ppm
496.339	[M+H]+	C24H51NO7P	LPC(16:0)	496.34	2.01475
496.339	[M+Na]+	C29H47NO4Na	CAR(22:5)	496.34	1.81327
522.354	[M+H]+	C26H53NO7P	CerP(t26:1)	522.355	1.76125
522.354	[M+H]+	C26H53NO7P	LPC(18:1)	522.355	1.76125
522.354	[M+H-H2O]+	C26H53NO7P	LPS(O-20:0)	522.355	1.76125
524.37	[M+Na]+	C31H51NO4Na	CAR(24:5)	524.371	1.75448
524.37	[M+H]+	C26H55NO7P	CerP(t26:0)	524.371	1.94519
524.37	[M+H]+	C26H55NO7P	LPC(18:0)	524.371	1.94519
560.31	[M+K]+	C26H52NO7PK	CerP(t26:1)	560.311	1.48132
560.31	[M+K]+	C26H52NO7PK	LPC(18:1)	560.311	1.48132
560.31	[M+H]+	C24H50NO11S	SHexSph(t18:0)	560.31	-1.01729
702.543	[M+H]+	C39H77NO7P	PE(O-34:2)	702.543	0.341616
702.543	[M+H]+	C39H77NO7P	PE(P-34:1)	702.543	0.341616
706.538	[M+H]+	C38H77NO8P	PC(30:0)	706.538	0.311377
706.538	[M+H]+	C38H77NO8P	PC(O-30:1(OH))	706.538	0.311377
706.538	[M+H]+	C38H77NO8P	PC(P-30:0(OH))	706.538	0.311377
720.59	[M+H]+	C40H83NO7P	CerP(t40:0)	720.59	0.11102
720.59	[M+H]+	C40H83NO7P	LPC(32:0)	720.59	0.11102
720.59	[M+H]+	C40H83NO7P	PC(O-32:0)	720.59	0.11102
728.559	[M+H]+	C41H79NO7P	PE(O-36:3)	728.559	0.247063
728.559	[M+H]+	C41H79NO7P	PE(P-36:2)	728.559	0.247063
730.574	[M+H]+	C41H81NO7P	PE(O-36:2)	730.574	0.095815
730.574	[M+H]+	C41H81NO7P	PE(P-36:1)	730.574	0.095815
732.554	[M+H]+	C40H79NO8P	PC(32:1)	732.554	0.177461
732.554	[M+H]+	C40H79NO8P	PC(P-32:1(OH))	732.554	0.177461
732.554	[M+H-H2O]+	C40H79NO8P	LPS(34:0)	732.554	0.177461
732.554	[M+H-H2O]+	C40H79NO8P	PS(O-34:0)	732.554	0.177461
740.499	[M+K]+	C39H76NO7PK	PE(O-34:2)	740.499	0.445645
740.499	[M+K]+	C39H76NO7PK	PE(P-34:1)	740.499	0.445645
740.522	[M+H]+	C41H75NO8P	PE(36:4)	740.523	0.013504
740.522	[M+H]+	C41H75NO8P	PE(O-36:5(OH))	740.523	0.013504
740.522	[M+H]+	C41H75NO8P	PE(P-36:4(OH))	740.523	0.013504
744.494	[M+K]+	C38H76NO8PK	PC(30:0)	744.494	0.188047
744.494	[M+K]+	C38H76NO8PK	PC(O-30:1(OH))	744.494	0.188047
744.494	[M+K]+	C38H76NO8PK	PC(P-30:0(OH))	744.494	0.188047
744.494	[M+Na]+	C41H72NO7PNa	PE(P-36:5)	744.494	0.0537278
744.554	[M+H]+	C41H79NO8P	PE(36:2)	744.554	0.0671543
744.554	[M+H]+	C41H79NO8P	PE(O-36:3(OH))	744.554	0.0671543
744.554	[M+H]+	C41H79NO8P	PE(P-36:2(OH))	744.554	0.0671543
744.59	[M+H]+	C42H83NO7P	CerP(t42:2)	744.59	-0.134302
744.59	[M+H]+	C42H83NO7P	PC(O-34:2)	744.59	-0.134302
744.59	[M+H]+	C42H83NO7P	PC(P-34:1)	744.59	-0.134302
746.509	[M+Na]+	C41H74NO7PNa	PE(O-36:5)	746.51	0.0803741
746.509	[M+Na]+	C41H74NO7PNa	PE(P-36:4)	746.51	0.0803741
746.509	[M+K]+	C38H78NO8PK	PC(O-30:0(OH))	746.51	0.348288
746.569	[M+H]+	C41H81NO8P	PE(36:1)	746.569	0.120551
746.569	[M+H]+	C41H81NO8P	PE(O-36:2(OH))	746.569	0.120551
746.569	[M+H]+	C41H81NO8P	PE(P-36:1(OH))	746.569	0.120551
746.606	[M+H]+	C42H85NO7P	CerP(t42:1)	746.606	-0.0267879
746.606	[M+H]+	C42H85NO7P	PC(O-34:1)	746.606	-0.0267879
746.606	[M+H]+	C42H85NO7P	PC(P-34:0)	746.606	-0.0267879
754.536	[M+Na]+	C40H78NO8PNa	PC(32:1)	754.536	0.106025
754.536	[M+Na]+	C40H78NO8PNa	PC(P-32:1(OH))	754.536	0.106025
766.515	[M+K]+	C41H78NO7PK	PE(O-36:3)	766.515	-0.260921
766.515	[M+K]+	C41H78NO7PK	PE(P-36:2)	766.515	-0.260921
768.554	[M+H]+	C43H79NO8P	PE(38:4)	768.554	-0.104092
768.554	[M+H]+	C43H79NO8P	PE(O-38:5(OH))	768.554	-0.104092
768.554	[M+H]+	C43H79NO8P	PE(P-38:4(OH))	768.554	-0.104092
770.51	[M+K]+	C40H78NO8PK	PC(32:1)	770.51	-0.103827
770.51	[M+K]+	C40H78NO8PK	PC(P-32:1(OH))	770.51	-0.103827
770.51	[M+Na]+	C43H74NO7PNa	PE(P-38:6)	770.51	-0.363396
770.51	[M+H]+	C38H76NO12S	SHexCer(t32:0)	770.508	-1.92081
774.54	[M+Na]+	C43H78NO7PNa	PE(O-38:5)	774.541	1.54931
774.54	[M+Na]+	C43H78NO7PNa	PE(P-38:4)	774.541	1.54931
774.54	[M+K]+	C40H82NO8PK	PC(O-32:0(OH))	774.541	1.80752
774.601	[M+H]+	C43H85NO8P	PE(38:1)	774.601	-0.258198
774.601	[M+H]+	C43H85NO8P	PE(O-38:2(OH))	774.601	-0.258198
774.601	[M+H]+	C43H85NO8P	PE(P-38:1(OH))	774.601	-0.258198
780.551	[M+Na]+	C42H80NO8PNa	PC(34:2)	780.551	0.0896802
780.551	[M+Na]+	C42H80NO8PNa	PC(O-34:3(OH))	780.551	0.0896802
780.551	[M+Na]+	C42H80NO8PNa	PC(P-34:2(OH))	780.551	0.0896802
782.509	[M+K]+	C41H78NO8PK	PE(36:2)	782.51	0.293926
782.509	[M+K]+	C41H78NO8PK	PE(O-36:3(OH))	782.51	0.293926
782.509	[M+K]+	C41H78NO8PK	PE(P-36:2(OH))	782.51	0.293926
784.525	[M+K]+	C41H80NO8PK	PE(36:1)	784.525	0.0382397
784.525	[M+K]+	C41H80NO8PK	PE(O-36:2(OH))	784.525	0.0382397
784.525	[M+K]+	C41H80NO8PK	PE(P-36:1(OH))	784.525	0.0382397
784.562	[M+K]+	C42H84NO7PK	CerP(t42:1)	784.562	-0.114714
784.562	[M+K]+	C42H84NO7PK	PC(O-34:1)	784.562	-0.114714
784.562	[M+K]+	C42H84NO7PK	PC(P-34:0)	784.562	-0.114714
784.582	[M+Na]+	C42H84NO8PNa	PC(34:0)	784.583	1.04514
784.582	[M+Na]+	C42H84NO8PNa	PC(O-34:1(OH))	784.583	1.04514
784.582	[M+Na]+	C42H84NO8PNa	PC(P-34:0(OH))	784.583	1.04514
784.586	[M+H]+	C44H83NO8P	PC(36:3)	784.585	-1.58045
784.586	[M+H]+	C44H83NO8P	PC(O-36:4(OH))	784.585	-1.58045
784.586	[M+H]+	C44H83NO8P	PC(P-36:3(OH))	784.585	-1.58045
784.586	[M+H-H2O]+	C44H83NO8P	PS(O-38:2)	784.585	-1.58045
784.586	[M+H-H2O]+	C44H83NO8P	PS(P-38:1)	784.585	-1.58045
786.505	[M+K]+	C40H78NO9PK	PC(32:1(OH))	786.505	0.0508579
786.505	[M+Na]+	C43H74NO8PNa	PE(38:6)	786.504	-0.203432
786.505	[M+H]+	C45H73NO8P	PE(40:9)	786.507	2.84804
786.505	[M+Na]+	C43H74NO8PNa	PE(P-38:6(OH))	786.504	-0.203432
786.505	[M+K]+	C40H78NO9PK	PS(O-34:1)	786.505	0.0508579
786.505	[M+K]+	C40H78NO9PK	PS(P-34:0)	786.505	0.0508579
786.541	[M+Na]+	C44H78NO7PNa	PC(P-36:5)	786.541	0.0889973
786.541	[M+K]+	C41H82NO8PK	PE(36:0)	786.541	0.343275
786.541	[M+K]+	C41H82NO8PK	PE(O-36:1(OH))	786.541	0.343275
786.541	[M+K]+	C41H82NO8PK	PE(P-36:0(OH))	786.541	0.343275
790.535	[M+Na]+	C43H78NO8PNa	PE(38:4)	790.536	0.581884
790.535	[M+Na]+	C43H78NO8PNa	PE(O-38:5(OH))	790.536	0.581884
790.535	[M+Na]+	C43H78NO8PNa	PE(P-38:4(OH))	790.536	0.581884
796.526	[M+K]+	C42H80NO8PK	PC(34:2)	796.525	-0.313863
796.526	[M+K]+	C42H80NO8PK	PC(O-34:3(OH))	796.525	-0.313863
796.526	[M+K]+	C42H80NO8PK	PC(P-34:2(OH))	796.525	-0.313863
796.526	[M+H]+	C40H78NO12S	SHexCer(t34:1)	796.524	-2.0715
796.585	[M+H]+	C45H83NO8P	PE(40:4)	796.585	-0.364054
796.585	[M+H]+	C45H83NO8P	PE(O-40:5(OH))	796.585	-0.364054
796.585	[M+H]+	C45H83NO8P	PE(P-40:4(OH))	796.585	-0.364054
800.557	[M+K]+	C42H84NO8PK	PC(34:0)	800.557	-0.374739
800.557	[M+K]+	C42H84NO8PK	PC(O-34:1(OH))	800.557	-0.374739
800.557	[M+K]+	C42H84NO8PK	PC(P-34:0(OH))	800.557	-0.374739
800.557	[M+Na]+	C45H80NO7PNa	PE(O-40:6)	800.557	-0.499652
800.557	[M+Na]+	C45H80NO7PNa	PE(P-40:5)	800.557	-0.499652
806.51	[M+K]+	C43H78NO8PK	PE(38:4)	806.51	-0.384372
806.51	[M+K]+	C43H78NO8PK	PE(O-38:5(OH))	806.51	-0.384372
806.51	[M+K]+	C43H78NO8PK	PE(P-38:4(OH))	806.51	-0.384372
812.557	[M+K]+	C43H84NO8PK	PE(38:1)	812.557	-0.46766
812.557	[M+K]+	C43H84NO8PK	PE(O-38:2(OH))	812.557	-0.46766
812.557	[M+K]+	C43H84NO8PK	PE(P-38:1(OH))	812.557	-0.46766
812.557	[M+Na]+	C46H80NO7PNa	PC(P-38:6)	812.557	-0.590728
814.536	[M+Na]+	C45H78NO8PNa	PE(40:6)	814.536	-0.527908
814.536	[M+Na]+	C45H78NO8PNa	PE(P-40:6(OH))	814.536	-0.527908
814.536	[M+K]+	C42H82NO9PK	PC(34:1(OH))	814.536	-0.282369
814.536	[M+H]+	C47H77NO8P	PE(42:9)	814.538	2.41855
814.536	[M+K]+	C42H82NO9PK	PS(O-36:1)	814.536	-0.282369
814.536	[M+K]+	C42H82NO9PK	PS(P-36:0)	814.536	-0.282369
814.633	[M+H]+	C46H89NO8P	PC(38:2)	814.632	-0.62605
814.633	[M+H]+	C46H89NO8P	PC(O-38:3(OH))	814.632	-0.62605
814.633	[M+H]+	C46H89NO8P	PC(P-38:2(OH))	814.632	-0.62605
814.633	[M+H-H2O]+	C46H89NO8P	PS(O-40:1)	814.632	-0.62605
814.633	[M+H-H2O]+	C46H89NO8P	PS(P-40:0)	814.632	-0.62605
822.541	[M+K]+	C44H82NO8PK	PC(36:3)	822.541	-0.498455
822.541	[M+K]+	C44H82NO8PK	PC(O-36:4(OH))	822.541	-0.498455
822.541	[M+K]+	C44H82NO8PK	PC(P-36:3(OH))	822.541	-0.498455
822.541	[M+H]+	C42H80NO12S	SHexCer(t36:2)	822.54	-2.2005
824.557	[M+K]+	C44H84NO8PK	PC(36:2)	824.557	-0.582131
824.557	[M+K]+	C44H84NO8PK	PC(O-36:3(OH))	824.557	-0.582131
824.557	[M+K]+	C44H84NO8PK	PC(P-36:2(OH))	824.557	-0.582131
824.557	[M+H]+	C42H82NO12S	SHexCer(t36:1)	824.555	-2.28002
828.552	[M+Na]+	C46H80NO8PNa	PC(38:6)	828.551	-0.543117
828.552	[M+Na]+	C46H80NO8PNa	PC(P-38:6(OH))	828.551	-0.543117
828.552	[M+H]+	C48H79NO8P	PC(40:9)	828.554	2.3535
828.552	[M+K]+	C43H84NO9PK	PE(38:1(OH))	828.552	-0.422424
830.51	[M+K]+	C45H78NO8PK	PE(40:6)	830.51	-0.565918
830.51	[M+K]+	C45H78NO8PK	PE(P-40:6(OH))	830.51	-0.565918
830.51	[M+K]+	C45H78NO8PK	PE(40:6)	830.51	-0.565918
830.51	[M+K]+	C45H78NO8PK	PE(P-40:6(OH))	830.51	-0.565918
830.567	[M+Na]+	C46H82NO8PNa	PC(38:5)	830.567	-0.433439
830.567	[M+Na]+	C46H82NO8PNa	PC(O-38:6(OH))	830.567	-0.433439
830.567	[M+Na]+	C46H82NO8PNa	PC(P-38:5(OH))	830.567	-0.433439
830.567	[M+H]+	C48H81NO8P	PC(40:8)	830.569	2.45615
830.567	[M+K]+	C43H86NO9PK	PE(38:0(OH))	830.567	-0.192639
830.567	[M+H-H2O]+	C48H81NO8P	PS(P-42:6)	830.569	2.45615
834.541	[M+K]+	C45H82NO8PK	PE(40:4)	834.541	-0.515253
834.541	[M+K]+	C45H82NO8PK	PE(O-40:5(OH))	834.541	-0.515253
834.541	[M+K]+	C45H82NO8PK	PE(P-40:4(OH))	834.541	-0.515253
836.544	[M+H-H2O]+	C46H79NO10P	PS(40:5(OH))	836.544	-0.346665
836.544	[M+H]+	C46H79NO10P	PS(40:6)	836.544	-0.346665
836.544	[M+H]+	C46H79NO10P	PS(P-40:6(OH))	836.544	-0.346665
836.601	[M+K]+	C46H87NO9K	HexCer(t40:2)	836.601	0.394453
836.601	[M+H]+	C44H87NO11P	PI-Cer(d38:1)	836.601	0.274922
836.601	[M+H-H2O]+	C44H87NO11P	PI-Cer(t38:0)	836.601	0.274922
836.601	[M+H]+	C44H87NO11P	PS(38:0(OH))	836.601	0.274922
838.633	[M+H]+	C48H89NO8P	PC(40:4)	838.632	-0.977783
838.633	[M+H]+	C48H89NO8P	PC(O-40:5(OH))	838.632	-0.977783
838.633	[M+H]+	C48H89NO8P	PC(P-40:4(OH))	838.632	-0.977783
838.633	[M+H-H2O]+	C48H89NO8P	PS(O-42:3)	838.632	-0.977783
838.633	[M+H-H2O]+	C48H89NO8P	PS(P-42:2)	838.632	-0.977783
842.664	[M+H]+	C48H93NO8P	PC(40:2)	842.663	-0.961238
842.664	[M+H]+	C48H93NO8P	PC(O-40:3(OH))	842.663	-0.961238
842.664	[M+H]+	C48H93NO8P	PC(P-40:2(OH))	842.663	-0.961238
842.664	[M+H-H2O]+	C48H93NO8P	PS(O-42:1)	842.663	-0.961238
842.664	[M+H-H2O]+	C48H93NO8P	PS(P-42:0)	842.663	-0.961238
844.526	[M+K]+	C46H80NO8PK	PC(38:6)	844.525	-0.73414
844.526	[M+K]+	C46H80NO8PK	PC(P-38:6(OH))	844.525	-0.73414
844.526	[M+K]+	C46H80NO8PK	PC(38:6)	844.525	-0.73414
844.526	[M+K]+	C46H80NO8PK	PC(P-38:6(OH))	844.525	-0.73414
846.526	[M+K]+	C42H82NO11PK	PI-Cer(d36:1)	846.526	-0.767844
846.526	[M+K]+	C42H82NO11PK	PS(36:0(OH))	846.526	-0.767844
846.542	[M+K]+	C46H82NO8PK	PC(38:5)	846.541	-0.661516
846.542	[M+K]+	C46H82NO8PK	PC(O-38:6(OH))	846.541	-0.661516
846.542	[M+K]+	C46H82NO8PK	PC(P-38:5(OH))	846.541	-0.661516
848.638	[M+K]+	C48H91NO8K	HexCer(d42:2)	848.638	-0.695232
848.638	[M+H-H2O]+	C46H91NO10P	PI-Cer(d40:0)	848.638	-0.813068
848.638	[M+H]+	C46H91NO10P	PS(40:0)	848.638	-0.813068
848.638	[M+H]+	C46H91NO10P	PS(O-40:1(OH))	848.638	-0.813068
848.638	[M+H]+	C46H91NO10P	PS(P-40:0(OH))	848.638	-0.813068
850.573	[M+K]+	C46H86NO8PK	PC(38:3)	850.572	-1.10514
850.573	[M+K]+	C46H86NO8PK	PC(O-38:4(OH))	850.572	-1.10514
850.573	[M+K]+	C46H86NO8PK	PC(P-38:3(OH))	850.572	-1.10514
850.573	[M+H]+	C44H84NO12S	SHexCer(t38:2)	850.571	-2.75109
852.588	[M+K]+	C46H88NO8PK	PC(38:2)	852.588	-0.621637
852.588	[M+K]+	C46H88NO8PK	PC(O-38:3(OH))	852.588	-0.621637
852.588	[M+K]+	C46H88NO8PK	PC(P-38:2(OH))	852.588	-0.621637
852.588	[M+H]+	C44H86NO12S	SHexCer(t38:1)	852.587	-2.2637
854.567	[M+Na]+	C48H82NO8PNa	PC(40:7)	854.567	-0.491477
854.567	[M+H]+	C50H81NO8P	PC(42:10)	854.569	2.31696
854.567	[M+K]+	C45H86NO9PK	PE(40:2(OH))	854.567	-0.25744
854.604	[M+K]+	C46H90NO8PK	PC(38:1)	854.604	-0.713781
854.604	[M+K]+	C46H90NO8PK	PC(O-38:2(OH))	854.604	-0.713781
854.604	[M+K]+	C46H90NO8PK	PC(P-38:1(OH))	854.604	-0.713781
854.604	[M+Na]+	C49H86NO7PNa	PE(P-44:6)	854.603	-0.947808
854.604	[M+H]+	C44H88NO12S	SHexCer(t38:0)	854.602	-2.35197
856.583	[M+Na]+	C48H84NO8PNa	PC(40:6)	856.583	-0.840549
856.583	[M+Na]+	C48H84NO8PNa	PC(P-40:6(OH))	856.583	-0.840549
856.583	[M+H]+	C50H83NO8P	PC(42:9)	856.585	1.96128
856.583	[M+K]+	C45H88NO9PK	PE(40:1(OH))	856.583	-0.723806
858.599	[M+Na]+	C48H86NO8PNa	PC(40:5)	858.598	-0.279525
858.599	[M+H]+	C50H85NO8P	PC(42:8)	858.601	2.51572
858.599	[M+Na]+	C48H86NO8PNa	PC(O-40:6(OH))	858.598	-0.279525
858.599	[M+Na]+	C48H86NO8PNa	PC(P-40:5(OH))	858.598	-0.279525
858.599	[M+K]+	C45H90NO9PK	PE(40:0(OH))	858.598	-0.0465875
858.599	[M+H-H2O]+	C50H85NO8P	PS(P-44:6)	858.601	2.51572
860.618	[M+H]+	C50H87NO8P	PC(42:7)	860.616	-1.87075
860.618	[M+H-H2O]+	C50H87NO8P	PS(O-44:6)	860.616	-1.87075
860.618	[M+H-H2O]+	C50H87NO8P	PS(P-44:5)	860.616	-1.87075
863.649	[M+Na]+	C49H93O8PNa	PA(46:2)	863.65	0.856829
863.649	[M+Na]+	C49H93O8PNa	PA(O-46:3(OH))	863.65	0.856829
863.649	[M+Na]+	C49H93O8PNa	PA(P-46:2(OH))	863.65	0.856829
870.696	[M+H]+	C50H97NO8P	PC(42:2)	870.695	-1.3897
870.696	[M+H]+	C50H97NO8P	PC(O-42:3(OH))	870.695	-1.3897
870.696	[M+H]+	C50H97NO8P	PC(P-42:2(OH))	870.695	-1.3897
870.696	[M+H-H2O]+	C50H97NO8P	PS(O-44:1)	870.695	-1.3897
870.696	[M+H-H2O]+	C50H97NO8P	PS(P-44:0)	870.695	-1.3897
872.557	[M+K]+	C48H84NO8PK	PC(40:6)	872.557	-0.985609
872.557	[M+K]+	C48H84NO8PK	PC(P-40:6(OH))	872.557	-0.985609
872.557	[M+K]+	C48H84NO8PK	PC(40:6)	872.557	-0.985609
872.557	[M+K]+	C48H84NO8PK	PC(P-40:6(OH))	872.557	-0.985609
872.711	[M+H]+	C50H99NO8P	PC(42:1)	872.71	-1.03127
872.711	[M+H]+	C50H99NO8P	PC(O-42:2(OH))	872.71	-1.03127
872.711	[M+H]+	C50H99NO8P	PC(P-42:1(OH))	872.71	-1.03127
872.711	[M+H-H2O]+	C50H99NO8P	PS(O-44:0)	872.71	-1.03127

## Sheet: TableSI2_ML_pos_non-unique
Precursor m/z	species	Chemical Composition	Short Name	Theo. m/z	ppm
441.239	[M+H-H2O]+	C23H38O6P	LPA(20:4)	441.24	-2.01704
441.239	[M+K]+	C25H38O4K	MG(22:6)	441.24	-2.47031
494.323	[M+Na]+	C29H45NO4Na	CAR(22:6)	494.324	-2.02296
494.323	[M+H-H2O]+	C24H49NO7P	LPS(O-18:0)	494.324	-2.02296
494.323	[M+H]+	C24H49NO7P	LPC(16:1)	494.324	-2.02296
496.339	[M+Na]+	C29H47NO4Na	CAR(22:5)	496.34	-1.81327
496.339	[M+H]+	C24H51NO7P	LPC(16:0)	496.34	-2.01475
522.354	[M+H]+	C26H53NO7P	CerP(t26:1)	522.355	-1.7804
522.354	[M+H-H2O]+	C26H53NO7P	LPS(O-20:0)	522.355	-1.7804
522.354	[M+H]+	C26H53NO7P	LPC(18:1)	522.355	-1.7804
524.37	[M+Na]+	C31H51NO4Na	CAR(24:5)	524.371	-1.6782
524.37	[M+H]+	C26H55NO7P	CerP(t26:0)	524.371	-1.86891
524.37	[M+H]+	C26H55NO7P	LPC(18:0)	524.371	-1.86891
544.339	[M+Na]+	C26H52NO7PNa	CerP(t26:1)	544.337	2.68216
544.339	[M+Na]+	C26H52NO7PNa	LPC(18:1)	544.337	2.68216
544.339	[M+H]+	C28H51NO7P	LPC(20:4)	544.34	-1.72686
546.352	[M+Na]+	C26H54NO7PNa	CerP(t26:0)	546.353	-1.66559
546.352	[M+Na]+	C26H54NO7PNa	LPC(18:0)	546.353	-1.66559
558.295	[M+K]+	C26H50NO7PK	LPC(18:2)	558.296	-1.46876
558.295	[M+H]+	C24H48NO11S	SHexSph(t18:1)	558.294	0.859762
562.326	[M+K]+	C26H54NO7PK	CerP(t26:0)	562.327	-1.45823
562.326	[M+K]+	C26H54NO7PK	LPC(18:0)	562.327	-1.45823
568.339	[M+Na]+	C28H52NO7PNa	LPC(20:3)	568.337	2.76244
568.339	[M+H]+	C30H51NO7P	LPC(22:6)	568.34	-1.46039
577.518	[M+Na]+	C35H70O4Na	DG(O-32:0)	577.517	2.21639
577.518	[M+H]+	C37H69O4	DG(O-34:3)	577.519	-1.93933
577.518	[M+H]+	C37H69O4	DG(P-34:2)	577.519	-1.93933
577.518	[M+H-H2O]+	C37H69O4	DG(34:1)	577.519	-1.93933
577.518	[M+Na]+	C35H70O4Na	MG(32:0)	577.517	2.21639
590.321	[M+Na]+	C30H50NO7PNa	LPC(22:6)	590.322	-1.27049
590.321	[M+K]+	C27H54NO8PK	PE(22:0)	590.322	-1.60929
605.453	[M+K]+	C35H66O5K	DG(32:1)	605.454	-1.23874
605.453	[M+H]+	C33H66O7P	LPA(30:1)	605.454	-1.07357
605.453	[M+H]+	C33H66O7P	PA(O-30:1)	605.454	-1.07357
605.453	[M+H]+	C33H66O7P	PA(P-30:0)	605.454	-1.07357
627.534	[M+Na]+	C39H72O4Na	DG(O-36:3)	627.532	2.88431
627.534	[M+H]+	C41H71O4	DG(O-38:6)	627.535	-0.940187
627.534	[M+Na]+	C39H72O4Na	DG(P-36:2)	627.532	2.88431
627.534	[M+H]+	C41H71O4	DG(P-38:5)	627.535	-0.940187
627.534	[M+H-H2O]+	C41H71O4	DG(38:4)	627.535	-0.940187
629.454	[M+K]+	C37H66O5K	DG(34:3)	629.454	-0.98498
629.454	[M+Na]+	C33H67O7PNa	LPA(30:0)	629.452	2.98673
629.454	[M+Na]+	C33H67O7PNa	PA(O-30:0)	629.452	2.98673
631.469	[M+K]+	C37H68O5K	DG(34:2)	631.47	-0.966
631.469	[M+H]+	C35H68O7P	PA(P-32:1)	631.47	-0.80764
633.485	[M+K]+	C37H70O5K	DG(34:1)	633.486	-0.994498
633.485	[M+H]+	C35H70O7P	LPA(32:1)	633.485	-0.836641
633.485	[M+H]+	C35H70O7P	PA(O-32:1)	633.485	-0.836641
633.485	[M+H]+	C35H70O7P	PA(P-32:0)	633.485	-0.836641
655.469	[M+K]+	C39H68O5K	DG(36:4)	655.47	-0.778068
655.469	[M+H]+	C37H68O7P	LPA(34:4)	655.47	-0.625506
655.469	[M+H]+	C37H68O7P	PA(O-34:4)	655.47	-0.625506
655.469	[M+H]+	C37H68O7P	PA(P-34:3)	655.47	-0.625506
657.485	[M+K]+	C39H70O5K	DG(36:3)	657.486	-0.882149
657.485	[M+Na]+	C35H71O7PNa	LPA(32:0)	657.483	2.92023
657.485	[M+Na]+	C35H71O7PNa	PA(O-32:0)	657.483	2.92023
657.485	[M+H]+	C37H70O7P	PA(O-34:3)	657.485	-0.730054
657.485	[M+H]+	C37H70O7P	PA(P-34:2)	657.485	-0.730054
659.501	[M+K]+	C39H72O5K	DG(36:2)	659.501	-0.758149
659.501	[M+H]+	C37H72O7P	PA(O-34:2)	659.501	-0.606519
659.501	[M+H]+	C37H72O7P	PA(P-34:1)	659.501	-0.606519
681.485	[M+K]+	C41H70O5K	DG(38:5)	681.486	-0.719017
681.485	[M+Na]+	C37H71O7PNa	PA(O-34:2)	681.483	2.94945
681.485	[M+H]+	C39H70O7P	PA(O-36:5)	681.485	-0.572279
681.485	[M+Na]+	C37H71O7PNa	PA(P-34:1)	681.483	2.94945
681.485	[M+H]+	C39H70O7P	PA(P-36:4)	681.485	-0.572279
716.522	[M+H]+	C39H75NO8P	PE(34:2)	716.523	-0.446601
716.522	[M+Na]+	C37H76NO8PNa	PE(O-32:0(OH))	716.52	2.90292
716.522	[M+H]+	C39H75NO8P	PE(O-34:3(OH))	716.523	-0.446601
716.522	[M+H]+	C39H75NO8P	PE(P-34:2(OH))	716.523	-0.446601
720.59	[M+H]+	C40H83NO7P	CerP(t40:0)	720.59	-0.33306
720.59	[M+H]+	C40H83NO7P	LPC(32:0)	720.59	-0.33306
720.59	[M+H]+	C40H83NO7P	PC(O-32:0)	720.59	-0.33306
732.554	[M+H-H2O]+	C40H79NO8P	LPS(34:0)	732.554	-0.232065
732.554	[M+H]+	C40H79NO8P	PC(32:1)	732.554	-0.232065
732.554	[M+H-H2O]+	C40H79NO8P	PS(O-34:0)	732.554	-0.232065
732.554	[M+H]+	C40H79NO8P	PC(P-32:1(OH))	732.554	-0.232065
734.437	[M+Na]+	C38H66NO9PNa	LPS(32:5)	734.437	-0.0816953
734.437	[M+Na]+	C38H66NO9PNa	PC(30:5(OH))	734.437	-0.0816953
734.569	[M+H]+	C40H81NO8P	PC(32:0)	734.569	-0.108907
734.569	[M+H]+	C40H81NO8P	PC(O-32:1(OH))	734.569	-0.108907
734.569	[M+H]+	C40H81NO8P	PC(P-32:0(OH))	734.569	-0.108907
738.508	[M+H]+	C41H73NO8P	PE(36:5)	738.507	1.00202
738.508	[M+H]+	C41H73NO8P	PE(P-36:5(OH))	738.507	1.00202
740.522	[M+H]+	C41H75NO8P	PE(36:4)	740.523	-0.175552
740.522	[M+H]+	C41H75NO8P	PE(O-36:5(OH))	740.523	-0.175552
740.522	[M+H]+	C41H75NO8P	PE(P-36:4(OH))	740.523	-0.175552
744.554	[M+H]+	C41H79NO8P	PE(36:2)	744.554	-0.120878
744.554	[M+H]+	C41H79NO8P	PE(O-36:3(OH))	744.554	-0.120878
744.554	[M+H]+	C41H79NO8P	PE(P-36:2(OH))	744.554	-0.120878
746.569	[M+H]+	C41H81NO8P	PE(36:1)	746.569	0.120551
746.569	[M+H]+	C41H81NO8P	PE(O-36:2(OH))	746.569	0.120551
746.569	[M+H]+	C41H81NO8P	PE(P-36:1(OH))	746.569	0.120551
754.535	[M+Na]+	C40H78NO8PNa	PC(32:1)	754.536	-0.689166
754.535	[M+Na]+	C40H78NO8PNa	PC(P-32:1(OH))	754.536	-0.689166
756.554	[M+H]+	C42H79NO8P	PC(34:3)	756.554	0.0660892
756.554	[M+H]+	C42H79NO8P	PC(O-34:4(OH))	756.554	0.0660892
756.554	[M+H]+	C42H79NO8P	PC(P-34:3(OH))	756.554	0.0660892
756.554	[M+H-H2O]+	C42H79NO8P	PS(O-36:2)	756.554	0.0660892
756.554	[M+H-H2O]+	C42H79NO8P	PS(P-36:1)	756.554	0.0660892
762.504	[M+Na]+	C41H74NO8PNa	PE(36:4)	762.504	-0.799995
762.504	[M+Na]+	C41H74NO8PNa	PE(O-36:5(OH))	762.504	-0.799995
762.504	[M+Na]+	C41H74NO8PNa	PE(P-36:4(OH))	762.504	-0.799995
764.523	[M+H]+	C43H75NO8P	PE(38:6)	764.523	0.0784804
764.523	[M+H]+	C43H75NO8P	PE(P-38:6(OH))	764.523	0.0784804
766.538	[M+H]+	C43H77NO8P	PE(38:5)	766.538	0.365279
766.538	[M+H]+	C43H77NO8P	PE(O-38:6(OH))	766.538	0.365279
766.538	[M+H]+	C43H77NO8P	PE(P-38:5(OH))	766.538	0.365279
768.554	[M+H]+	C43H79NO8P	PE(38:4)	768.554	0.0910802
768.554	[M+H]+	C43H79NO8P	PE(O-38:5(OH))	768.554	0.0910802
768.554	[M+H]+	C43H79NO8P	PE(P-38:4(OH))	768.554	0.0910802
770.51	[M+K]+	C40H78NO8PK	PC(32:1)	770.51	0.129784
770.51	[M+K]+	C40H78NO8PK	PC(P-32:1(OH))	770.51	0.129784
770.51	[M+H]+	C38H76NO12S	SHexCer(t32:0)	770.508	1.94677
770.51	[M+Na]+	C43H74NO7PNa	PE(P-38:6)	770.51	0.389353
772.549	[M+H]+	C42H79NO9P	PC(34:3(OH))	772.549	0.194163
772.549	[M+H-H2O]+	C42H79NO9P	PS(36:1)	772.549	0.194163
772.549	[M+H-H2O]+	C42H79NO9P	PS(O-36:2(OH))	772.549	0.194163
772.549	[M+H-H2O]+	C42H79NO9P	PS(P-36:1(OH))	772.549	0.194163
772.549	[M+H]+	C42H79NO9P	PS(O-36:3)	772.549	0.194163
772.549	[M+H]+	C42H79NO9P	PS(P-36:2)	772.549	0.194163
772.585	[M+H]+	C43H83NO8P	PE(38:2)	772.585	0.0388307
772.585	[M+H]+	C43H83NO8P	PE(O-38:3(OH))	772.585	0.0388307
772.585	[M+H]+	C43H83NO8P	PE(P-38:2(OH))	772.585	0.0388307
778.479	[M+K]+	C41H74NO8PK	PE(36:4)	778.478	0.166992
778.479	[M+K]+	C41H74NO8PK	PE(O-36:5(OH))	778.478	0.166992
778.479	[M+K]+	C41H74NO8PK	PE(P-36:4(OH))	778.478	0.166992
778.536	[M+Na]+	C42H78NO8PNa	PC(34:3)	778.536	0.0642231
778.536	[M+Na]+	C42H78NO8PNa	PC(O-34:4(OH))	778.536	0.0642231
778.536	[M+Na]+	C42H78NO8PNa	PC(P-34:3(OH))	778.536	0.0642231
786.505	[M+K]+	C40H78NO9PK	PC(32:1(OH))	786.505	0.0381435
786.505	[M+Na]+	C43H74NO8PNa	PE(38:6)	786.504	0.292433
786.505	[M+H]+	C45H73NO8P	PE(40:9)	786.507	-2.75904
786.505	[M+Na]+	C43H74NO8PNa	PE(P-38:6(OH))	786.504	0.292433
786.505	[M+K]+	C40H78NO9PK	PS(O-34:1)	786.505	0.0381435
786.505	[M+K]+	C40H78NO9PK	PS(P-34:0)	786.505	0.0381435
788.617	[M+H]+	C44H87NO8P	PC(36:1)	788.616	0.228248
788.617	[M+H]+	C44H87NO8P	PC(O-36:2(OH))	788.616	0.228248
788.617	[M+H]+	C44H87NO8P	PC(P-36:1(OH))	788.616	0.228248
788.617	[M+H-H2O]+	C44H87NO8P	PS(O-38:0)	788.616	0.228248
790.559	[M+K]+	C44H81NO8K	HexCer(d38:3)	790.559	0.0885449
790.559	[M+H]+	C42H81NO10P	PS(36:1)	790.559	0.215038
790.559	[M+H-H2O]+	C42H81NO10P	PI-Cer(d36:1)	790.559	0.215038
790.559	[M+H-H2O]+	C42H81NO10P	PS(36:0(OH))	790.559	0.215038
790.559	[M+H]+	C42H81NO10P	PS(O-36:2(OH))	790.559	0.215038
790.559	[M+H]+	C42H81NO10P	PS(P-36:1(OH))	790.559	0.215038
792.554	[M+H]+	C45H79NO8P	PE(40:6)	792.554	0.290201
792.554	[M+H]+	C45H79NO8P	PE(P-40:6(OH))	792.554	0.290201
794.51	[M+K]+	C42H78NO8PK	PC(34:3)	794.51	0.251728
794.51	[M+K]+	C42H78NO8PK	PC(O-34:4(OH))	794.51	0.251728
794.51	[M+H]+	C40H76NO12S	SHexCer(t34:2)	794.508	2.01382
794.51	[M+K]+	C42H78NO8PK	PC(P-34:3(OH))	794.51	0.251728
794.531	[M+Na]+	C42H78NO9PNa	PC(34:3(OH))	794.531	0.41534
794.531	[M+H]+	C44H77NO9P	PC(36:6(OH))	794.533	-2.6053
794.531	[M+H-H2O]+	C44H77NO9P	PS(38:4)	794.533	-2.6053
794.531	[M+H-H2O]+	C44H77NO9P	PS(O-38:5(OH))	794.533	-2.6053
794.531	[M+H-H2O]+	C44H77NO9P	PS(P-38:4(OH))	794.533	-2.6053
794.531	[M+Na]+	C42H78NO9PNa	PS(O-36:3)	794.531	0.41534
794.531	[M+H]+	C44H77NO9P	PS(O-38:6)	794.533	-2.6053
794.531	[M+Na]+	C42H78NO9PNa	PS(P-36:2)	794.531	0.41534
794.531	[M+H]+	C44H77NO9P	PS(P-38:5)	794.533	-2.6053
796.585	[M+H]+	C45H83NO8P	PE(40:4)	796.585	0.0125536
796.585	[M+H]+	C45H83NO8P	PE(O-40:5(OH))	796.585	0.0125536
796.585	[M+H]+	C45H83NO8P	PE(P-40:4(OH))	796.585	0.0125536
798.541	[M+K]+	C42H82NO8PK	PC(34:1)	798.541	0.275502
798.541	[M+K]+	C42H82NO8PK	PC(O-34:2(OH))	798.541	0.275502
798.541	[M+K]+	C42H82NO8PK	PC(P-34:1(OH))	798.541	0.275502
798.541	[M+H]+	C40H80NO12S	SHexCer(t34:0)	798.54	2.0287
798.541	[M+Na]+	C45H78NO7PNa	PE(P-40:6)	798.541	0.525959
802.479	[M+K]+	C43H74NO8PK	PE(38:6)	802.478	0.348919
802.479	[M+K]+	C43H74NO8PK	PE(P-38:6(OH))	802.478	0.348919
802.536	[M+Na]+	C44H78NO8PNa	PC(36:5)	802.536	0.361355
802.536	[M+H]+	C46H77NO8P	PC(38:8)	802.538	-2.62916
802.536	[M+K]+	C41H82NO9PK	PE(36:0(OH))	802.536	0.112145
802.536	[M+Na]+	C44H78NO8PNa	PC(P-36:5(OH))	802.536	0.361355
802.536	[M+H-H2O]+	C46H77NO8P	PS(P-40:6)	802.538	-2.62916
802.596	[M+H]+	C44H85NO9P	PC(36:2(OH))	802.596	0.348868
802.596	[M+H-H2O]+	C44H85NO9P	PS(38:0)	802.596	0.348868
802.596	[M+H-H2O]+	C44H85NO9P	PS(O-38:1(OH))	802.596	0.348868
802.596	[M+H-H2O]+	C44H85NO9P	PS(P-38:0(OH))	802.596	0.348868
802.596	[M+H]+	C44H85NO9P	PS(O-38:2)	802.596	0.348868
802.596	[M+H]+	C44H85NO9P	PS(P-38:1)	802.596	0.348868
804.495	[M+K]+	C43H76NO8PK	PE(38:5)	804.494	0.807961
804.495	[M+K]+	C43H76NO8PK	PE(O-38:6(OH))	804.494	0.807961
804.495	[M+K]+	C43H76NO8PK	PE(P-38:5(OH))	804.494	0.807961
806.51	[M+K]+	C43H78NO8PK	PE(38:4)	806.51	0.27278
806.51	[M+K]+	C43H78NO8PK	PE(O-38:5(OH))	806.51	0.27278
806.51	[M+K]+	C43H78NO8PK	PE(P-38:4(OH))	806.51	0.27278
806.554	[M+H]+	C42H81NO11P	PI-Cer(d36:2)	806.554	-0.334757
806.554	[M+H]+	C42H81NO11P	PS(36:1(OH))	806.554	-0.334757
806.554	[M+H-H2O]+	C42H81NO11P	PI-Cer(t36:1)	806.554	-0.334757
810.542	[M+K]+	C43H82NO8PK	PE(38:2)	810.541	0.666222
810.542	[M+K]+	C43H82NO8PK	PE(O-38:3(OH))	810.541	0.666222
810.542	[M+K]+	C43H82NO8PK	PE(P-38:2(OH))	810.541	0.666222
814.56	[M+H]+	C44H81NO10P	PS(38:3)	814.559	0.552446
814.56	[M+H-H2O]+	C44H81NO10P	PI-Cer(d38:3)	814.559	0.552446
814.56	[M+H-H2O]+	C44H81NO10P	PS(38:2(OH))	814.559	0.552446
814.56	[M+H]+	C44H81NO10P	PS(O-38:4(OH))	814.559	0.552446
814.56	[M+H]+	C44H81NO10P	PS(P-38:3(OH))	814.559	0.552446
816.575	[M+H]+	C44H83NO10P	PS(38:2)	816.575	0.465358
816.575	[M+H-H2O]+	C44H83NO10P	PI-Cer(d38:2)	816.575	0.465358
816.575	[M+H-H2O]+	C44H83NO10P	PS(38:1(OH))	816.575	0.465358
816.575	[M+H]+	C44H83NO10P	PS(O-38:3(OH))	816.575	0.465358
816.575	[M+H]+	C44H83NO10P	PS(P-38:2(OH))	816.575	0.465358
818.51	[M+K]+	C44H78NO8PK	PC(36:5)	818.51	0.452041
818.51	[M+K]+	C44H78NO8PK	PC(P-36:5(OH))	818.51	0.452041
818.591	[M+K]+	C46H85NO8K	HexCer(d40:3)	818.591	0.366484
818.591	[M+H]+	C44H85NO10P	PS(38:1)	818.591	0.488645
818.591	[M+H-H2O]+	C44H85NO10P	PI-Cer(d38:1)	818.591	0.488645
818.591	[M+H-H2O]+	C44H85NO10P	PS(38:0(OH))	818.591	0.488645
818.591	[M+H]+	C44H85NO10P	PS(O-38:2(OH))	818.591	0.488645
818.591	[M+H]+	C44H85NO10P	PS(P-38:1(OH))	818.591	0.488645
820.526	[M+K]+	C44H80NO8PK	PC(36:4)	820.525	-0.548429
820.526	[M+K]+	C44H80NO8PK	PC(O-36:5(OH))	820.525	-0.548429
820.526	[M+K]+	C44H80NO8PK	PC(P-36:4(OH))	820.525	-0.548429
822.541	[M+K]+	C44H82NO8PK	PC(36:3)	822.541	0.461983
822.541	[M+K]+	C44H82NO8PK	PC(O-36:4(OH))	822.541	0.461983
822.541	[M+H]+	C42H80NO12S	SHexCer(t36:2)	822.54	2.16403
822.541	[M+K]+	C44H82NO8PK	PC(P-36:3(OH))	822.541	0.461983
828.515	[M+Na]+	C45H76NO9PNa	PE(40:7(OH))	828.515	0.603489
828.515	[M+H]+	C47H75NO9P	PE(42:10(OH))	828.517	-2.29325
828.515	[M+K]+	C42H80NO10PK	PS(36:1)	828.515	0.482791
828.515	[M+K]+	C42H80NO10PK	PS(O-36:2(OH))	828.515	0.482791
828.515	[M+K]+	C42H80NO10PK	PS(P-36:1(OH))	828.515	0.482791
828.536	[M+Na]+	C42H80NO11PNa	PI-Cer(d36:2)	828.536	-0.0603474
828.536	[M+Na]+	C42H80NO11PNa	PS(36:1(OH))	828.536	-0.0603474
828.536	[M+H]+	C44H79NO11P	PS(38:4(OH))	828.538	-2.95701
830.567	[M+Na]+	C46H82NO8PNa	PC(38:5)	830.567	-0.0240799
830.567	[M+H]+	C48H81NO8P	PC(40:8)	830.569	-2.91366
830.567	[M+Na]+	C46H82NO8PNa	PC(O-38:6(OH))	830.567	-0.0240799
830.567	[M+K]+	C43H86NO9PK	PE(38:0(OH))	830.567	-0.264879
830.567	[M+Na]+	C46H82NO8PNa	PC(P-38:5(OH))	830.567	-0.0240799
830.567	[M+H-H2O]+	C48H81NO8P	PS(P-42:6)	830.569	-2.91366
834.585	[M+H]+	C44H85NO11P	PI-Cer(d38:2)	834.586	-0.131802
834.585	[M+H]+	C44H85NO11P	PS(38:1(OH))	834.586	-0.131802
834.585	[M+H-H2O]+	C44H85NO11P	PI-Cer(t38:1)	834.586	-0.131802
836.617	[M+H]+	C48H87NO8P	PC(40:5)	836.616	0.74108
836.617	[M+H]+	C48H87NO8P	PC(O-40:6(OH))	836.616	0.74108
836.617	[M+H]+	C48H87NO8P	PC(P-40:5(OH))	836.616	0.74108
836.617	[M+H-H2O]+	C48H87NO8P	PS(O-42:4)	836.616	0.74108
836.617	[M+H-H2O]+	C48H87NO8P	PS(P-42:3)	836.616	0.74108
838.573	[M+K]+	C45H86NO8PK	PE(40:2)	838.572	0.667802
838.573	[M+K]+	C45H86NO8PK	PE(O-40:3(OH))	838.572	0.667802
838.573	[M+K]+	C45H86NO8PK	PE(P-40:2(OH))	838.572	0.667802
838.633	[M+H]+	C48H89NO8P	PC(40:4)	838.632	0.65583
838.633	[M+H]+	C48H89NO8P	PC(O-40:5(OH))	838.632	0.65583
838.633	[M+H]+	C48H89NO8P	PC(P-40:4(OH))	838.632	0.65583
838.633	[M+H-H2O]+	C48H89NO8P	PS(O-42:3)	838.632	0.65583
838.633	[M+H-H2O]+	C48H89NO8P	PS(P-42:2)	838.632	0.65583
840.589	[M+K]+	C45H88NO8PK	PE(40:1)	840.588	1.0112
840.589	[M+Na]+	C48H84NO7PNa	PC(P-40:6)	840.588	1.13016
840.589	[M+K]+	C45H88NO8PK	PE(O-40:2(OH))	840.588	1.0112
840.589	[M+K]+	C45H88NO8PK	PE(P-40:1(OH))	840.588	1.0112
842.591	[M+H]+	C46H85NO10P	PS(40:3)	842.591	0.415386
842.591	[M+H]+	C46H85NO10P	PS(O-40:4(OH))	842.591	0.415386
842.591	[M+H-H2O]+	C46H85NO10P	PI-Cer(d40:3)	842.591	0.415386
842.591	[M+H-H2O]+	C46H85NO10P	PS(40:2(OH))	842.591	0.415386
842.591	[M+H]+	C46H85NO10P	PS(P-40:3(OH))	842.591	0.415386
844.511	[M+K]+	C42H80NO11PK	PI-Cer(d36:2)	844.51	0.556536
844.511	[M+K]+	C42H80NO11PK	PS(36:1(OH))	844.51	0.556536
844.526	[M+K]+	C46H80NO8PK	PC(38:6)	844.525	-0.663094
844.526	[M+K]+	C46H80NO8PK	PC(P-38:6(OH))	844.525	-0.663094
848.557	[M+K]+	C46H84NO8PK	PC(38:4)	848.557	-0.754222
848.557	[M+K]+	C46H84NO8PK	PC(O-38:5(OH))	848.557	-0.754222
848.557	[M+K]+	C46H84NO8PK	PC(P-38:4(OH))	848.557	-0.754222
852.536	[M+Na]+	C44H80NO11PNa	PS(38:3(OH))	852.536	0.328432
852.536	[M+H]+	C46H79NO11P	PS(40:6(OH))	852.538	-2.48669
856.583	[M+Na]+	C48H84NO8PNa	PC(40:6)	856.583	0.817201
856.583	[M+H]+	C50H83NO8P	PC(42:9)	856.585	-1.98462
856.583	[M+K]+	C45H88NO9PK	PE(40:1(OH))	856.583	0.700458
856.583	[M+Na]+	C48H84NO8PNa	PC(P-40:6(OH))	856.583	0.817201
862.573	[M+K]+	C47H86NO8PK	PE(42:4)	862.572	0.857899
862.573	[M+K]+	C47H86NO8PK	PE(O-42:5(OH))	862.572	0.857899
862.573	[M+K]+	C47H86NO8PK	PE(P-42:4(OH))	862.572	0.857899
866.604	[M+K]+	C47H90NO8PK	PE(42:2)	866.604	0.715437
866.604	[M+K]+	C47H90NO8PK	PE(O-42:3(OH))	866.604	0.715437
866.604	[M+K]+	C47H90NO8PK	PE(P-42:2(OH))	866.604	0.715437
872.557	[M+K]+	C48H84NO8PK	PC(40:6)	872.557	0.813701
872.557	[M+K]+	C48H84NO8PK	PC(P-40:6(OH))	872.557	0.813701
876.537	[M+Na]+	C46H80NO11PNa	PS(40:5(OH))	876.536	1.49452
876.537	[M+H]+	C48H79NO11P	PS(42:8(OH))	876.538	-1.24353
941.619	[M+Na]+	C49H90O15Na	DGDG(34:1)	941.617	1.73106
941.619	[M+H]+	C51H89O15	DGDG(36:4)	941.62	-0.81774

## Sheet: TableSI3_MB_neg_unique
Mouse Brain MS-
ID	Precursor m/z	species	Chemical Composition	Main Class	Short Name	Theo. m/z	ppm	Identified fragments from AutoMS/MS or MS1 identification
1	656.501	[M-H]-	C37H71NO6P	CerP	CerP(d37:2)	656.503	-2.42193	MS1
2	607.458	[M+HCOO]-	C36H63O7	DG	DG(32:3)	607.458	0.55971	MS1
3	478.294	[M-H]-	C23H45NO7P	LPE	LPE(18:1)	478.294	-0.0836306	MS1*
4	500.278	[M-H]-	C25H43NO7P	LPE	LPE(20:4)	500.278	-0.0599666	MS1
5	524.278	[M-H]-	C27H43NO7P	LPE	LPE(22:6)	524.278	-0.133517	MS1
6	619.289	[M-H]-	C29H48O12P	LPI	LPI(20:4)	619.289	-0.0484427	MS1
7	568.268	[M-H]-	C28H43NO9P	LPS	LPS(22:6)	568.268	0.211168	MS1
8	413.246	[M+Cl]-	C23H38O4Cl	MG	MG(20:4)	413.246	0.16939	MS1*
9	804.576	[M+HCOO]-	C43H83NO10P	PC	PC(34:1)	804.576	0	M-HCOOCH3 (744.55468)
10	832.608	[M+HCOO]-	C45H87NO10P	PC	PC(36:1)	832.607	0.53	M-HCOOCH3 (772.58579)
11	854.593	[M+HCOO]-	C47H85NO10P	PC	PC(38:4)	854.592	1.74	M-HCOOCH3 (794.5716)
12	856.548	[M-H]-	C49H79NO9P	PE	PE(44:9(OH))	856.55	-2.54509	MS1*
13	700.529	[M-H]-	C39H75NO7P	PE	PE(O-34:2) or PE(P-34:1)	700.529	0.0570997	MS1
14	728.56	[M-H]-	C41H79NO7P	PE	PE(O-36:2) or PE(P-36:1)	728.56	-0.274514	MS1
15	726.544	[M-H]-	C41H77NO7P	PE	PE(O-36:3) or PE(P-36:2)	726.544	-0.0137638	MS1
16	722.513	[M-H]-	C41H73NO7P	PE	PE(O-36:5) or PE(P-36:4)	722.513	-0.0968841	MS1
17	750.544	[M-H]-	C43H77NO7P	PE	PE(O-38:5) or PE(P-38:4)	750.544	0.173208	MS1
18	748.529	[M-H]-	C43H75NO7P	PE	PE(O-38:6) or PE(P-38:5)	748.529	0.360708	MS1
19	776.562	[M-H]-	C45H79NO7P	PE	PE(O-40:6) or PE(P-40:5)	776.56	2.13763	MS1
20	746.513	[M-H]-	C43H73NO7P	PE	PE(P-38:6)	746.513	0.0803737	MS1
21	774.544	[M-H]-	C45H77NO7P	PE	PE(P-40:6)	774.544	0.0258216	MS1
22	865.503	[M-H]-	C50H74O10P	PG	PG(44:12)	865.503	1.05141	MS1
23	822.578	[M-H]-	C43H84NO11S	SHexCer	SHexCer(d37:0)	822.577	1.47099	MS1
24	820.563	[M-H]-	C43H82NO11S	SHexCer	SHexCer(d37:1)	820.561	1.38929	MS1
25	888.624	[M-H]-	C48H90NO11S	SHexCer	SHexCer(d42:2)	888.624	-0.281334	MS1
26	681.297	[M-H]-	C34H49O12S	SQDG	SQDG(25:7)	681.295	2.2604	MS1
27	939.531	[M-H]-	C53H79O12S	SQDG	SQDG(44:11)	939.53	1.78813	MS1*
28	637.541	[M-H]-	C39H73O6	TG	TG(36:0)	637.541	-0.59604	MS1*

## Sheet: TableSI4_ML_neg_unique
Mouse Liver MS-
ID	Precursor m/z	species	Chemical Composition	Main Class	Short Name	Theo. m/z	ppm	Identified fragments from AutoMS/MS or MS1 identification
1	420.288	[M+Cl]-	C22H43NO4Cl	CAR	CAR(15:0)	420.289	-0.690002	MS1
2	574.498	[M+Cl]-	C34H69NO3Cl	Cer	Cer(d34:0)	574.497	2.10619	MS1
3	572.482	[M+Cl]-	C34H67NO3Cl	Cer	Cer(d34:1)	572.481	0.139743	MS1
4	656.576	[M+Cl]-	C40H79NO3Cl	Cer	Cer(d40:1)	656.575	0.533069	MS1
4	666.604	[M+HCOO]-	C41H80NO5	Cer	Cer(d40:1)	666.604	-0.555052	MS1
5	670.59	[M+Cl]-	C41H81NO3Cl	Cer	Cer(d41:1)	670.591	-1.53596	MS1
6	684.607	[M+Cl]-	C42H83NO3Cl	Cer	Cer(d42:1)	684.607	-0.0438208	MS1
6	694.635	[M+HCOO]-	C43H84NO5	Cer	Cer(d42:1)	694.635	-0.014396	MS1
7	682.591	[M+Cl]-	C42H81NO3Cl	Cer	Cer(d42:2)	682.591	-0.161151	MS1
7	692.619	[M+HCOO]-	C43H82NO5	Cer	Cer(d42:2)	692.62	-0.952904	MS1
8	710.63	[M+HCOO]-	C43H84NO6	Cer	Cer(t42:1)	710.63	-0.154792	MS1
9	738.662	[M+HCOO]-	C45H88NO6	Cer	Cer(t44:1)	738.662	0.527982	MS1
10	736.646	[M+HCOO]-	C45H86NO6	Cer	Cer(t44:2)	736.646	0.366526	MS1
11	566.338	[M+Cl]-	C28H54NO6PCl	CerP	CerP(d28:2)	566.338	0.0353146	MS1
12	602.454	[M-H]-	C33H65NO6P	CerP	CerP(d33:1)	602.456	-2.90478	MS1
13	630.485	[M-H]-	C35H69NO6P	CerP	CerP(d35:1)	630.487	-2.69633	MS1
14	628.47	[M-H]-	C35H67NO6P	CerP	CerP(d35:2)	628.471	-2.67315	MS1
15	629.492	[M+Cl]-	C37H70O5Cl	DG	DG(34:1)	629.492	0.270059	MS1
15	639.52	[M+HCOO]-	C38H71O7	DG	DG(34:1)	639.52	-0.641105	MS1
16	627.476	[M+Cl]-	C37H68O5Cl	DG	DG(34:2)	627.476	-0.0637474	MS1
16	637.505	[M+HCOO]-	C38H69O7	DG	DG(34:2)	637.505	0.109803	MS1
17	625.462	[M+Cl]-	C37H66O5Cl	DG	DG(34:3)	625.46	2.31829	MS1
18	655.507	[M+Cl]-	C39H72O5Cl	DG	DG(36:2)	655.507	-0.472916	MS1
18	665.536	[M+HCOO]-	C40H73O7	DG	DG(36:2)	665.536	-0.150255	MS1
19	653.492	[M+Cl]-	C39H70O5Cl	DG	DG(36:3)	653.492	0.44377	MS1
19	663.52	[M+HCOO]-	C40H71O7	DG	DG(36:3)	663.52	-0.301422	MS1
20	651.476	[M+Cl]-	C39H68O5Cl	DG	DG(36:4)	651.476	0.0153498	MS1
20	661.505	[M+HCOO]-	C40H69O7	DG	DG(36:4)	661.505	-0.0453511	MS1
21	611.526	[M+HCOO]-	C37H71O6	DG	DG(O-33:1) or DG(P-33:0)	611.526	0.457871	MS1
22	639.556	[M+HCOO]-	C39H75O6	DG	DG(O-35:1) or DG(P-35:0)	639.557	-0.906878	MS1
23	439.138	[M+Cl]-	C18H28O10Cl	FA	FA(18:0(OH4,Ke2,Ep2))	439.138	0.500982	MS1
23	449.167	[M+HCOO]-	C19H29O12	FA	FA(18:0(OH4,Ke2,Ep2))	449.166	0.423006	MS1
24	467.168	[M+Cl]-	C20H32O10Cl	FA	FA(20:0(OH4,Ke2,Ep2))	467.169	-1.22012	MS1
24	477.198	[M+HCOO]-	C21H33O12	FA	FA(20:0(OH4,Ke2,Ep2))	477.198	0.293379	MS1
25	465.103	[M+HCOO]-	C21H21O12	FA	FA(20:5(OH4,Ke2,Ep2,cyclo))	465.104	-1.03203	MS1
26	435.296	[M+HCOO]-	C22H43O8	FA	FA(21:0(OH4))	435.296	-0.137837	MS1
27	491.214	[M+HCOO]-	C22H35O12	FA	FA(21:0(OH4,Ke2,Ep2))	491.213	1.81184	MS1
28	463.328	[M+HCOO]-	C24H47O8	FA	FA(23:0(OH4))	463.328	0.129498	MS1
29	489.14	[M+HCOO]-	C24H25O11	FA	FA(23:6(OH3,Ke2,Ep2,cyclo))	489.14	0.20444	MS1
30	519.151	[M+HCOO]-	C25H27O12	FA	FA(24:6(OH4,Ke2,Ep2,cyclo))	519.151	0	MS1
31	533.167	[M+HCOO]-	C26H29O12	FA	FA(25:6(OH4,Ke2,Ep2,cyclo))	533.167	1.12535	MS1
32	411.384	[M-H]-	C26H51O3	FA	FA(26:0(OH))	411.384	-0.0729245	MS1
33	537.152	[M+Cl]-	C26H30O10Cl	FA	FA(26:6(OH4,Ke2,Ep2,cyclo))	537.153	-2.96005	MS1
33	547.181	[M+HCOO]-	C27H31O12	FA	FA(26:6(OH4,Ke2,Ep2,cyclo))	547.182	-2.79614	MS1
34	543.317	[M-H]-	C28H47O10	FA	FA(28:0(OH4,Ke2,Ep2))	543.317	-0.84665	MS1*
35	409.311	[M-H]-	C28H41O2	FA	FA(28:6(cyclo))	409.311	-0.171019	MS1
36	575.214	[M+HCOO]-	C29H35O12	FA	FA(28:6(OH4,Ke2,Ep2,cyclo))	575.213	0.53893	MS1
37	571.349	[M-H]-	C30H51O10	FA	FA(30:0(OH4,Ke2,Ep2))	571.349	-0.227532	MS1*
38	529.237	[M+Cl]-	C30H38O6Cl	FA	FA(30:6(Ke2,Ep2,cyclo))	529.236	0.831387	MS1
39	599.38	[M-H]-	C32H55O10	FA	FA(32:0(OH4,Ke2,Ep2))	599.38	-0.283626	MS1*
40	615.281	[M+HCOO]-	C33H43O11	FA	FA(32:6(OH3,Ke2,Ep2,cyclo))	615.281	-0.568846	MS1
41	627.411	[M-H]-	C34H59O10	FA	FA(34:0(OH4,Ke2,Ep2))	627.411	-0.494094	MS1*
42	450.271	[M+HCOO]-	C21H40NO9	HexSph	HexSph(d14:1)	450.271	-0.37755	MS1
43	892.557	[M+Cl]-	C46H83NO13Cl	LacCer	LacCer(d34:3)	892.556	1.73659	MS1
44	950.681	[M+HCOO]-	C50H96NO15	LacCer	LacCer(d37:0)	950.679	2.42984	MS1
45	766.496	[M-H]-	C38H72NO14	LacCer	LacCer(t26:0)	766.496	0.652319	MS1
46	822.558	[M-H]-	C42H80NO14	LacCer	LacCer(t30:0)	822.558	-0.559231	MS1
47	632.342	[M+Cl]-	C28H55NO12Cl	LacSph	LacSph(d16:0)	632.342	0.1107	MS1
48	670.393	[M+Cl]-	C32H61NO11Cl	LacSph	LacSph(m20:1)	670.394	-1.34249	MS1
49	582.315	[M-H]-	C26H48NO13	LacSph	LacSph(t14:1)	582.313	2.4729	MS1
50	445.211	[M+Cl]-	C19H39O7PCl	LPA	LPA(16:0)	445.213	-2.98734	MS1
51	473.243	[M+Cl]-	C21H43O7PCl	LPA	LPA(18:0)	473.244	-2.87378	MS1
52	475.211	[M+HCOO]-	C22H36O9P	LPA	LPA(18:4)	475.21	1.47303	MS1*
53	499.259	[M+Cl]-	C23H45O7PCl	LPA	LPA(20:1)	499.26	-0.681008	MS1
54	429.217	[M+Cl]-	C19H39O6PCl	LPA	LPA(P-16:0)	429.218	-1.18821	MS1
54	439.247	[M+HCOO]-	C20H40O8P	LPA	LPA(P-16:0)	439.247	0.682988	MS1*
55	485.279	[M+Cl]-	C23H47O6PCl	LPA	LPA(P-20:0)	485.28	-2.84372	MS1
56	530.302	[M+Cl]-	C24H50NO7PCl	LPC	LPC(16:0)	530.302	-0.0754287	MS1*
57	554.302	[M+Cl]-	C26H50NO7PCl	LPC	LPC(18:2)	554.302	-0.126285	MS1
57	564.331	[M+HCOO]-	C27H51NO9P	LPC	LPC(18:2)	564.331	0.177201	MS1
58	552.287	[M+Cl]-	C26H48NO7PCl	LPC	LPC(18:3)	552.286	0.869114	MS1
58	562.315	[M+HCOO]-	C27H49NO9P	LPC	LPC(18:3)	562.315	0.284538	MS1
59	580.317	[M+Cl]-	C28H52NO7PCl	LPC	LPC(20:3)	580.318	-0.327407	MS1
60	578.302	[M+Cl]-	C28H50NO7PCl	LPC	LPC(20:4)	578.302	0.190212	MS1
60	588.331	[M+HCOO]-	C29H51NO9P	LPC	LPC(20:4)	588.331	-0.18697	MS1
61	614.346	[M+HCOO]-	C31H53NO9P	LPC	LPC(22:5)	614.346	-0.537156	MS1
62	602.302	[M+Cl]-	C30H50NO7PCl	LPC	LPC(22:6)	602.302	-0.0996178	MS1
62	612.331	[M+HCOO]-	C31H51NO9P	LPC	LPC(22:6)	612.331	0.0653242	MS1
63	480.31	[M-H]-	C23H47NO7P	LPE	LPE(18:0)	480.31	-0.166559	MS1*
64	478.294	[M-H]-	C23H45NO7P	LPE	LPE(18:1)	478.294	0.104538	MS1*
65	476.278	[M-H]-	C23H43NO7P	LPE	LPE(18:2)	476.278	0.335938	MS1
66	508.341	[M-H]-	C25H51NO7P	LPE	LPE(20:0)	508.341	-0.0196718	MS1*
67	506.325	[M-H]-	C25H49NO7P	LPE	LPE(20:1)	506.325	0.355503	MS1*
68	504.31	[M-H]-	C25H47NO7P	LPE	LPE(20:2)	504.31	-0.138804	MS1*
69	502.294	[M-H]-	C25H45NO7P	LPE	LPE(20:3)	502.294	0.537534	MS1
70	500.278	[M-H]-	C25H43NO7P	LPE	LPE(20:4)	500.278	0.1799	MS1
71	528.31	[M-H]-	C27H47NO7P	LPE	LPE(22:4)	528.31	0.283924	MS1
72	524.278	[M-H]-	C27H43NO7P	LPE	LPE(22:6)	524.278	0.0381477	MS1
73	590.303	[M+Cl]-	C29H50NO7PCl	LPE	LPE(24:5)	590.302	1.52464	MS1
74	543.295	[M+HCOO]-	C24H48O11P	LPG	LPG(17:0)	543.294	1.19641	MS1
75	571.326	[M+HCOO]-	C26H52O11P	LPG	LPG(19:0)	571.325	0.367566	MS1
76	617.358	[M+Cl]-	C29H59O9PCl	LPG	LPG(23:0)	617.359	-2.08955	MS1
77	561.334	[M+Cl]-	C26H55O8PCl	LPG	LPG(O-20:0)	561.333	1.8171	MS1*
78	559.319	[M+Cl]-	C26H53O8PCl	LPG	LPG(P-20:0)	559.317	2.93215	MS1*
79	543.258	[M-H]-	C23H44O12P	LPI	LPI(14:0)	543.258	0.0368149	MS1
80	587.246	[M+HCOO]-	C24H44O14P	LPI	LPI(14:1)	587.247	-2.6224	MS1
81	571.289	[M-H]-	C25H48O12P	LPI	LPI(16:0)	571.289	-0.420103	MS1
81	607.264	[M+Cl]-	C25H49O12PCl	LPI	LPI(16:0)	607.266	-2.02547	MS1
82	619.289	[M-H]-	C29H48O12P	LPI	LPI(20:4)	619.289	-0.435984	MS1
83	697.357	[M+HCOO]-	C32H58O14P	LPI	LPI(22:2)	697.357	0.430196	MS1
84	723.374	[M+HCOO]-	C34H60O14P	LPI	LPI(24:3)	723.373	1.96303	MS1
85	823.403	[M+HCOO]-	C35H69O17P2	LPIP	LPIP(25:0)	823.402	1.90672	MS1
86	540.259	[M+HCOO]-	C23H43NO11P	LPS	LPS(16:1)	540.258	1.66587	MS1
87	594.305	[M+HCOO]-	C27H49NO11P	LPS	LPS(20:2)	594.305	-0.588923	MS1
88	624.352	[M+HCOO]-	C29H55NO11P	LPS	LPS(22:1)	624.352	0.400415	MS1*
89	576.331	[M-H]-	C28H51NO9P	LPS	LPS(22:2)	576.331	0.850206	MS1*
90	568.269	[M-H]-	C28H43NO9P	LPS	LPS(22:6)	568.268	1.68934	MS1
91	650.368	[M+HCOO]-	C31H57NO11P	LPS	LPS(24:2)	650.367	0.307518	MS1*
92	648.352	[M+HCOO]-	C31H55NO11P	LPS	LPS(24:3)	648.352	-0.12339	MS1
93	678.399	[M+HCOO]-	C33H61NO11P	LPS	LPS(26:2)	678.399	0.265331	MS1*
94	706.43	[M+HCOO]-	C35H65NO11P	LPS	LPS(28:2)	706.43	-0.353892	MS1*
95	744.402	[M+Cl]-	C38H64NO9PCl	LPS	LPS(32:6)	744.401	0.63138	MS1
96	584.357	[M+HCOO]-	C27H55NO10P	LPS	LPS(O-20:0)	584.357	-0.0342257	MS1
97	582.341	[M+HCOO]-	C27H53NO10P	LPS	LPS(P-20:0)	582.341	0.0171721	MS1
98	413.247	[M+Cl]-	C23H38O4Cl	MG	MG(20:4)	413.246	0.580767	MS1*
99	447.324	[M+Cl]-	C25H48O4Cl	MG	MG(22:1)	447.325	-0.87185	MS1*
100	439.263	[M+Cl]-	C25H40O4Cl	MG	MG(22:5)	439.262	1.09274	MS1*
101	601.323	[M+HCOO]-	C30H49O12	MGDG	MGDG(20:3)	601.323	-0.79824	MS1*
85	691.464	[M+HCOO]-	C36H67O12	MGDG	MGDG(26:0)	691.464	0.809876	MS1
86	719.496	[M+HCOO]-	C38H71O12	MGDG	MGDG(28:0)	719.495	0.61154	MS1
87	669.458	[M-H]-	C37H65O10	MGDG	MGDG(28:2)	669.458	0.238999	MS1
88	697.489	[M-H]-	C39H69O10	MGDG	MGDG(30:2)	697.49	-0.716857	MS1
89	982.623	[M-H]-	C49H93NO16P	MIPC	MIPC(d37:1)	982.624	-0.732732	MS1
90	436.3	[M+Cl]-	C26H43NO2Cl	NAE	NAE(24:5)	436.299	2.08573	MS1
91	464.331	[M+Cl]-	C28H47NO2Cl	NAE	NAE(26:5)	464.33	2.19671	MS1
92	462.316	[M+Cl]-	C28H45NO2Cl	NAE	NAE(26:6)	462.314	2.53075	MS1
93	660.523	[M+HCOO]-	C37H74NO6S	NAT	NAT(34:0)	660.524	-1.74104	MS1
94	701.397	[M+Cl]-	C37H63O8PCl	PA	PA(34:5)	701.395	1.85345	MS1
95	849.544	[M-H]-	C51H78O8P	PA	PA(48:11)	849.544	-0.0941682	MS1*
96	863.522	[M-H]-	C51H76O9P	PA	PA(48:12(OH))	863.523	-1.27385	MS1*
97	877.577	[M-H]-	C53H82O8P	PA	PA(50:11)	877.575	1.69786	MS1*
98	891.554	[M-H]-	C53H80O9P	PA	PA(50:12(OH))	891.555	-0.12338	MS1*
99	601.364	[M+Cl]-	C29H59O8PCl	PA	PA(O-26:0(OH))	601.364	-0.465608	MS1
100	664.42	[M+HCOO]-	C33H63NO10P	PC	PC(24:1)	664.419	0.285964	MS1*
101	746.497	[M+HCOO]-	C39H73NO10P	PC	PC(30:2)	746.498	-0.803753	MS1*
102	774.528	[M+HCOO]-	C41H77NO10P	PC	PC(32:2)	774.529	-0.787575	MS1*
103	770.497	[M+HCOO]-	C41H73NO10P	PC	PC(32:4)	770.498	-1.36276	MS1*
104	792.532	[M+Cl]-	C42H80NO8PCl	PC	PC(34:2)	792.532	-0.09	FA 16:1(+O) (179.0560), FA 16:0(+O) (255.2328), FA 18:2(+O) (279.2328), FA 18:1(+O) (281.24844), M-CH3 (742.5392)
104	802.56	[M+HCOO]-	C43H81NO10P	PC	PC(34:2)	802.56	0	FA 16:1(+O) (253.2171), FA 16:0(+O) (255.2328), FA 18:2(+O) (279.2328), FA 18:1(+O) (281.2484), M-FA 18:2(+O) (480.3087), M-HCOOCH3 (742.5392)
105	794.498	[M+HCOO]-	C43H73NO10P	PC	PC(34:6)	794.498	0.427943	MS1*
106	826.561	[M+HCOO]-	C45H81NO10P	PC	PC(36:4)	826.56	0.15	M-HCOOCH3 (766.5393), M-2*H2O (790.5394)
107	848.543	[M+HCOO]-	C47H79NO10P	PC	PC(38:7)	848.545	-1.52025	MS1*
108	876.575	[M+HCOO]-	C49H83NO10P	PC	PC(40:7)	876.576	-1.03813	MS1*
109	612.352	[M+HCOO]-	C28H55NO11P	PE	PE(22:0(OH))	612.352	0.506245	MS1*
110	624.388	[M+HCOO]-	C30H59NO10P	PE	PE(24:0)	624.388	-0.416408	MS1
111	622.373	[M+HCOO]-	C30H57NO10P	PE	PE(24:1)	622.373	-0.12854	MS1*
112	674.404	[M+HCOO]-	C34H61NO10P	PE	PE(28:3)	674.404	-0.0741395	MS1*
113	668.431	[M-H]-	C36H63NO8P	PE	PE(31:4)	668.43	2.42359	MS1
114	738.508	[M-H]-	C41H73NO8P	PE	PE(36:4)	738.508	0.08	FA 16:0(+O) (255.2328), FA 20:4(+O) (303.2328), FA 20:4(-H) (452.2776)
115	778.503	[M-H]-	C43H73NO9P	PE	PE(38:6(OH))	778.503	0.488116	MS1
116	762.508	[M-H]-	C43H73NO8P	PE	PE(38:6)	762.508	-0.21	FA 18:2(+O) (279.2328), FA 18:1(+O) (281.24843), FA 20:4(+O) (303.2329), FA 22:6(+O) (327.2328), FA 22:6(-H) (452.2780), M-FA 20:6(-H) (480.3093), M-FA 16:2(-H) (528.3091)
117	760.492	[M-H]-	C43H71NO8P	PE	PE(38:7)	760.492	-0.828411	MS1
118	788.523	[M-H]-	C45H75NO8P	PE	PE(40:7)	788.524	-0.837007	MS1
119	722.512	[M-H]-	C41H73NO7P	PE	PE(O-36:5) or PE(P-36:4)	722.513	-1.12109	MS1
120	972.834	[M-H]-	C57H115NO8P	PE	PE(O-52:0(OH))	972.837	-2.99125	MS1
121	866.585	[M+Cl]-	C49H86NO7PCl	PE	PE(P-44:6)	866.584	1.69632	MS1*
122	894.617	[M+Cl]-	C51H90NO7PCl	PE	PE(P-46:6)	894.615	2.01204	MS1*
123	617.43	[M-H]-	C32H62N2O7P	PE-Cer	PE-Cer(t30:2)	617.43	-0.631651	MS1
124	645.356	[M+Cl]-	C30H59O10PCl	PG	PG(24:0)	645.354	2.52575	MS1
125	643.34	[M+Cl]-	C30H57O10PCl	PG	PG(24:1)	643.338	2.3005	MS1
126	785.473	[M+Cl]-	C39H75O11PCl	PG	PG(33:1(OH))	785.474	-0.954837	MS1
127	869.566	[M+Cl]-	C45H87O11PCl	PG	PG(39:1(OH))	869.568	-2.43799	MS1
128	881.569	[M+Cl]-	C46H87O11PCl	PG	PG(40:2(OH))	881.568	0.986878	MS1*
129	879.555	[M+Cl]-	C46H85O11PCl	PG	PG(40:3(OH))	879.552	2.83099	MS1
130	887.523	[M+Cl]-	C47H81O11PCl	PG	PG(41:6(OH))	887.521	2.65909	MS1
131	909.601	[M+Cl]-	C48H91O11PCl	PG	PG(42:2(OH))	909.599	1.63808	MS1
132	905.568	[M+Cl]-	C48H87O11PCl	PG	PG(42:4(OH))	905.568	0.507968	MS1*
133	881.513	[M+Cl]-	C48H79O10PCl	PG	PG(42:8)	881.51	2.47303	MS1
134	913.539	[M+Cl]-	C49H83O11PCl	PG	PG(43:7(OH))	913.537	2.74756	MS1
135	933.601	[M+Cl]-	C50H91O11PCl	PG	PG(44:4(OH))	933.599	2.13154	MS1
136	929.568	[M+Cl]-	C50H87O11PCl	PG	PG(44:6(OH))	929.568	0.344246	MS1*
137	743.399	[M+HCOO]-	C34H64O15P	PI	PI(24:0)	743.399	-0.0403552	MS1
138	851.493	[M+HCOO]-	C42H76O15P	PI	PI(32:2)	851.493	0.305346	MS1*
139	863.49	[M+HCOO]-	C43H76O15P	PI	PI(33:3)	863.493	-2.6057	MS1
140	901.544	[M-H]-	C47H82O14P	PI	PI(38:4(OH))	901.545	-0.90955	MS1
141	939.526	[M+HCOO]-	C49H80O15P	PI	PI(39:7)	939.524	2.32032	MS1
142	740.472	[M-H]-	C36H71NO12P	PI-Cer	PI-Cer(t30:0)	740.472	0.324118	MS1*
143	738.456	[M-H]-	C36H69NO12P	PI-Cer	PI-Cer(t30:1)	738.456	-0.176043	MS1*
144	830.495	[M+Cl]-	C40H78NO12PCl	PI-Cer	PI-Cer(t34:1)	830.496	-1.11981	MS1
145	783.295	[M+HCOO]-	C30H57O19P2	PIP	PIP(20:0(OH))	783.298	-2.56607	MS1
146	881.363	[M+Cl]-	C37H68O17P2Cl	PIP	PIP(28:2(OH))	881.363	0.408458	MS1
147	566.31	[M-H]-	C26H49NO10P	PS	PS(20:0)	566.31	-0.353163	MS1
148	594.341	[M-H]-	C28H53NO10P	PS	PS(22:0)	594.341	-0.235555	MS1
149	608.357	[M-H]-	C29H55NO10P	PS	PS(23:0)	608.357	-0.197253	MS1
150	622.373	[M-H]-	C30H57NO10P	PS	PS(24:0)	622.373	-0.12854	MS1
150	668.378	[M+HCOO]-	C31H59NO12P	PS	PS(24:0)	668.378	-0.568541	MS1
151	636.352	[M-H]-	C30H55NO11P	PS	PS(24:1(OH))	636.352	0.0314292	MS1
152	666.364	[M+HCOO]-	C31H57NO12P	PS	PS(24:1)	666.362	1.92088	MS1
153	634.372	[M-H]-	C31H57NO10P	PS	PS(25:1)	634.373	-0.362563	MS1
154	700.396	[M+Cl]-	C33H64NO10PCl	PS	PS(27:0)	700.396	0.171332	MS1
155	674.404	[M-H]-	C34H61NO10P	PS	PS(28:2)	674.404	-0.0741395	MS1
156	688.42	[M-H]-	C35H63NO10P	PS	PS(29:2)	688.419	0.319573	MS1
157	760.406	[M+HCOO]-	C37H63NO13P	PS	PS(30:4(OH))	760.404	1.63071	MS1*
158	738.397	[M-H]-	C38H61NO11P	PS	PS(32:6(OH))	738.399	-2.47834	MS1
159	818.482	[M+HCOO]-	C41H73NO13P	PS	PS(34:3(OH))	818.482	-0.122177	MS1
160	842.483	[M+HCOO]-	C43H73NO13P	PS	PS(36:5(OH))	842.482	0.344221	MS1
161	874.546	[M+HCOO]-	C45H81NO13P	PS	PS(38:3(OH))	874.545	0.537422	MS1
162	850.49	[M+HCOO]-	C45H73NO12P	PS	PS(38:7)	850.488	2.56324	MS1
163	874.58	[M+HCOO]-	C46H85NO12P	PS	PS(39:2)	874.582	-1.50929	MS1
164	862.536	[M+Cl]-	C45H82NO10PCl	PS	PS(39:3)	862.537	-1.70427	MS1
165	878.52	[M+HCOO]-	C47H77NO12P	PS	PS(40:7)	878.519	1.26349	MS1
166	874.489	[M+HCOO]-	C47H73NO12P	PS	PS(40:9)	874.488	2.08122	MS1
167	904.546	[M+Cl]-	C47H84NO11PCl	PS	PS(41:4(OH))	904.548	-2.24422	MS1
167	914.574	[M+HCOO]-	C48H85NO13P	PS	PS(41:4(OH))	914.576	-2.78818	MS1
168	898.58	[M+HCOO]-	C48H85NO12P	PS	PS(41:4)	898.582	-1.68043	MS1
169	928.546	[M+Cl]-	C49H84NO11PCl	PS	PS(43:6(OH))	928.548	-2.16467	MS1
170	922.579	[M+HCOO]-	C50H85NO12P	PS	PS(43:6)	922.582	-2.92657	MS1
171	730.443	[M+Cl]-	C35H70NO10PCl	PS	PS(O-29:0(OH))	730.443	-0.164284	MS1
172	758.473	[M+Cl]-	C37H74NO10PCl	PS	PS(O-31:0(OH))	758.474	-1.30525	MS1
173	856.538	[M+Cl]-	C43H83NO11SCl	SHexCer	SHexCer(d37:1)	856.538	0.116749	MS1
174	510.237	[M-H]-	C22H40NO10S	SHexSph	SHexSph(d16:2)	510.238	-1.74428	MS1
175	538.269	[M-H]-	C24H44NO10S	SHexSph	SHexSph(d18:2)	538.269	-0.854591	MS1
176	604.299	[M+HCOO]-	C25H50NO13S	SHexSph	SHexSph(t18:0)	604.301	-2.76352	MS1
177	747.565	[M+HCOO]-	C40H80N2O8P	SM	SM(d34:1)	747.566	-0.628707	MS1*
178	831.66	[M+HCOO]-	C46H92N2O8P	SM	SM(d40:1)	831.66	0.396797	MS1*
179	857.675	[M+HCOO]-	C48H94N2O8P	SM	SM(d42:2)	857.675	-0.827819	MS1*
180	669.296	[M-H]-	C33H49O12S	SQDG	SQDG(24:6)	669.295	1.65846	MS1
181	681.296	[M-H]-	C34H49O12S	SQDG	SQDG(25:7)	681.295	1.89345	MS1
182	867.55	[M+HCOO]-	C44H83O14S	SQDG	SQDG(34:0)	867.551	-0.703129	MS1*
183	911.522	[M+HCOO]-	C48H79O14S	SQDG	SQDG(38:6)	911.52	2.45743	MS1*
184	891.532	[M-H]-	C49H79O12S	SQDG	SQDG(40:7)	891.53	2.13117	MS1*
185	965.522	[M+Cl]-	C52H82O12SCl	SQDG	SQDG(43:9)	965.522	0.217499	MS1
186	609.51	[M-H]-	C37H69O6	TG	TG(34:0)	609.51	-0.574232	MS1*
187	667.516	[M+HCOO]-	C39H71O8	TG	TG(35:1)	667.515	0.434447	MS1
188	637.541	[M-H]-	C39H73O6	TG	TG(36:0)	637.541	0.188223	MS1*
189	635.526	[M-H]-	C39H71O6	TG	TG(36:1)	635.526	0.267495	MS1*
190	695.546	[M+HCOO]-	C41H75O8	TG	TG(37:1)	695.547	-1.10704	MS1
191	709.562	[M+HCOO]-	C42H77O8	TG	TG(38:1)	709.562	-0.239584	MS1
192	737.593	[M+HCOO]-	C44H81O8	TG	TG(40:1)	737.594	-0.921917	MS1
193	683.527	[M-H]-	C43H71O6	TG	TG(40:5)	683.526	2.09209	MS1
194	709.543	[M-H]-	C45H73O6	TG	TG(42:6)	709.541	2.67779	MS1
195	521.53	[M-H]-	C35H69O2	WE	WE(35:0)	521.53	-0.556056	MS1
196	549.561	[M-H]-	C37H73O2	WE	WE(37:0)	549.562	-0.327534	MS1

## Sheet: TableSI5_MB_neg_non-unique
Precursor m/z	species	Chemical Composition	Short Name	Theo. m/z	ppm
401.291	[M-H]-	C22H41O6	FA(22:0(OH3,Ep))	401.291	0
401.291	[M-H]-	C22H41O6	FA(22:0(OH3,Ke))	401.291	0
401.291	[M-H]-	C22H41O6	FA(22:0(OH4,cyclo))	401.291	0
401.291	[M-H]-	C22H41O6	FA(22:1(OH4))	401.291	0
401.291	[M+Formate]-	C22H41O6	MG(18:1)	401.291	0
445.317	[M+Formate]-	C24H45O7	DG(20:0)	445.317	-0.0898236
445.317	[M-H]-	C24H45O7	FA(24:0(OH4,Ep))	445.317	-0.0898236
445.317	[M-H]-	C24H45O7	FA(24:0(OH4,Ke))	445.317	-0.0898236
467.301	[M-H]-	C26H43O7	FA(26:0(OH,Ke2,Ep2))	467.301	0.149796
467.301	[M-H]-	C26H43O7	FA(26:0(OH2,Ke,Ep2,cyclo))	467.301	0.149796
467.301	[M-H]-	C26H43O7	FA(26:0(OH2,Ke2,Ep,cyclo))	467.301	0.149796
467.301	[M-H]-	C26H43O7	FA(26:1(OH2,Ke,Ep2))	467.301	0.149796
467.301	[M-H]-	C26H43O7	FA(26:1(OH2,Ke2,Ep))	467.301	0.149796
467.301	[M-H]-	C26H43O7	FA(26:1(OH3,Ep2,cyclo))	467.301	0.149796
467.301	[M-H]-	C26H43O7	FA(26:1(OH3,Ke,Ep,cyclo))	467.301	0.149796
467.301	[M-H]-	C26H43O7	FA(26:1(OH3,Ke2,cyclo))	467.301	0.149796
467.301	[M-H]-	C26H43O7	FA(26:2(OH3,Ep2))	467.301	0.149796
467.301	[M-H]-	C26H43O7	FA(26:2(OH3,Ke,Ep))	467.301	0.149796
467.301	[M-H]-	C26H43O7	FA(26:2(OH3,Ke2))	467.301	0.149796
467.301	[M-H]-	C26H43O7	FA(26:2(OH4,Ep,cyclo))	467.301	0.149796
467.301	[M-H]-	C26H43O7	FA(26:2(OH4,Ke,cyclo))	467.301	0.149796
467.301	[M-H]-	C26H43O7	FA(26:3(OH4,Ep))	467.301	0.149796
467.301	[M-H]-	C26H43O7	FA(26:3(OH4,Ke))	467.301	0.149796
491.301	[M-H]-	C28H43O7	FA(28:1(OH,Ke2,Ep2,cyclo))	491.301	-0.34602
491.301	[M-H]-	C28H43O7	FA(28:2(OH,Ke2,Ep2))	491.301	-0.34602
491.301	[M-H]-	C28H43O7	FA(28:2(OH2,Ke,Ep2,cyclo))	491.301	-0.34602
491.301	[M-H]-	C28H43O7	FA(28:2(OH2,Ke2,Ep,cyclo))	491.301	-0.34602
491.301	[M-H]-	C28H43O7	FA(28:3(OH2,Ke,Ep2))	491.301	-0.34602
491.301	[M-H]-	C28H43O7	FA(28:3(OH2,Ke2,Ep))	491.301	-0.34602
491.301	[M-H]-	C28H43O7	FA(28:3(OH3,Ep2,cyclo))	491.301	-0.34602
491.301	[M-H]-	C28H43O7	FA(28:3(OH3,Ke,Ep,cyclo))	491.301	-0.34602
491.301	[M-H]-	C28H43O7	FA(28:3(OH3,Ke2,cyclo))	491.301	-0.34602
491.301	[M-H]-	C28H43O7	FA(28:4(OH3,Ep2))	491.301	-0.34602
491.301	[M-H]-	C28H43O7	FA(28:4(OH3,Ke,Ep))	491.301	-0.34602
491.301	[M-H]-	C28H43O7	FA(28:4(OH3,Ke2))	491.301	-0.34602
491.301	[M-H]-	C28H43O7	FA(28:4(OH4,Ep,cyclo))	491.301	-0.34602
491.301	[M-H]-	C28H43O7	FA(28:4(OH4,Ke,cyclo))	491.301	-0.34602
491.301	[M-H]-	C28H43O7	FA(28:5(OH4,Ep))	491.301	-0.34602
491.301	[M-H]-	C28H43O7	FA(28:5(OH4,Ke))	491.301	-0.34602
566.346	[M+Formate]-	C27H53NO9P	CerP(t26:1)	566.346	-0.335484
566.346	[M+Formate]-	C27H53NO9P	LPC(18:1)	566.346	-0.335484
566.346	[M-H]-	C27H53NO9P	PE(22:0(OH))	566.346	-0.335484
599.321	[M-H]-	C27H52O12P	LPI(18:0)	599.32	0.86765
599.321	[M+Formate]-	C27H52O12P	PG(20:0)	599.32	0.86765
673.481	[M-H]-	C37H70O8P	PA(34:1)	673.481	0.0445447
673.481	[M-H]-	C37H70O8P	PA(O-34:2(OH))	673.481	0.0445447
673.481	[M-H]-	C37H70O8P	PA(P-34:1(OH))	673.481	0.0445447
716.524	[M-H]-	C39H75NO8P	PE(O-34:2(OH))	716.524	0.307038
716.524	[M+Formate]-	C39H75NO8P	CerP(d38:2)	716.524	0.307038
716.524	[M-H]-	C39H75NO8P	PE(34:1)	716.524	0.307038
716.524	[M-H]-	C39H75NO8P	PE(P-34:1(OH))	716.524	0.307038
738.508	[M-H]-	C41H73NO8P	PE(O-36:5(OH))	738.508	0.230194
738.508	[M-H]-	C41H73NO8P	PE(36:4)	738.508	0.230194
738.508	[M-H]-	C41H73NO8P	PE(P-36:4(OH))	738.508	0.230194
742.54	[M-H]-	C41H77NO8P	PE(O-36:3(OH))	742.539	0.444421
742.54	[M+Formate]-	C41H77NO8P	CerP(d40:3)	742.539	0.444421
742.54	[M-H]-	C41H77NO8P	PE(36:2)	742.539	0.444421
742.54	[M-H]-	C41H77NO8P	PE(P-36:2(OH))	742.539	0.444421
744.555	[M-H]-	C41H79NO8P	PE(O-36:2(OH))	744.555	-0.120878
744.555	[M+Formate]-	C41H79NO8P	CerP(d40:2)	744.555	-0.120878
744.555	[M-H]-	C41H79NO8P	PE(36:1)	744.555	-0.120878
744.555	[M-H]-	C41H79NO8P	PE(P-36:1(OH))	744.555	-0.120878
747.517	[M-H]-	C40H76O10P	PG(O-34:2(OH))	747.518	-0.94981
747.517	[M+Formate]-	C40H76O10P	PA(36:1)	747.518	-0.94981
747.517	[M+Formate]-	C40H76O10P	PA(O-36:2(OH))	747.518	-0.94981
747.517	[M+Formate]-	C40H76O10P	PA(P-36:1(OH))	747.518	-0.94981
747.517	[M-H]-	C40H76O10P	PG(34:1)	747.518	-0.94981
747.517	[M-H]-	C40H76O10P	PG(P-34:1(OH))	747.518	-0.94981
762.508	[M-H]-	C43H73NO8P	PE(P-38:6(OH))	762.508	0.0524585
762.508	[M-H]-	C43H73NO8P	PE(38:6)	762.508	0.0524585
764.524	[M-H]-	C43H75NO8P	PE(O-38:6(OH))	764.524	0.196201
764.524	[M-H]-	C43H75NO8P	PE(38:5)	764.524	0.196201
764.524	[M-H]-	C43H75NO8P	PE(P-38:5(OH))	764.524	0.196201
766.539	[M-H]-	C43H77NO8P	PE(O-38:5(OH))	766.539	0.143502
766.539	[M-H]-	C43H77NO8P	PE(38:4)	766.539	0.143502
766.539	[M-H]-	C43H77NO8P	PE(P-38:4(OH))	766.539	0.143502
768.531	[M+Cl]-	C40H80NO8PCl	PC(O-32:1(OH))	768.532	-0.208189
768.531	[M+Cl]-	C40H80NO8PCl	PC(32:0)	768.532	-0.208189
768.531	[M+Cl]-	C40H80NO8PCl	PC(P-32:0(OH))	768.532	-0.208189
778.56	[M+Formate]-	C41H81NO10P	PC(32:0)	778.56	-0.205507
778.56	[M+Formate]-	C41H81NO10P	PC(O-32:1(OH))	778.56	-0.205507
778.56	[M+Formate]-	C41H81NO10P	PC(P-32:0(OH))	778.56	-0.205507
786.528	[M+Formate]-	C42H77NO10P	PE(36:3)	786.529	-1.90711
786.528	[M+Formate]-	C42H77NO10P	PE(O-36:4(OH))	786.529	-1.90711
786.528	[M+Formate]-	C42H77NO10P	PE(P-36:3(OH))	786.529	-1.90711
786.528	[M-H]-	C42H77NO10P	PS(36:2)	786.529	-1.90711
786.528	[M-H]-	C42H77NO10P	PS(O-36:3(OH))	786.529	-1.90711
786.528	[M-H]-	C42H77NO10P	PS(P-36:2(OH))	786.529	-1.90711
788.544	[M+Formate]-	C42H79NO10P	PE(36:2)	788.545	-0.31704
788.544	[M+Formate]-	C42H79NO10P	PE(O-36:3(OH))	788.545	-0.31704
788.544	[M+Formate]-	C42H79NO10P	PE(P-36:2(OH))	788.545	-0.31704
788.544	[M-H]-	C42H79NO10P	PS(36:1)	788.545	-0.31704
788.544	[M-H]-	C42H79NO10P	PS(O-36:2(OH))	788.545	-0.31704
788.544	[M-H]-	C42H79NO10P	PS(P-36:1(OH))	788.545	-0.31704
790.539	[M-H]-	C45H77NO8P	PE(40:6)	790.539	0.252992
790.539	[M-H]-	C45H77NO8P	PE(P-40:6(OH))	790.539	0.252992
794.547	[M+Cl]-	C42H82NO8PCl	PC(34:1)	794.547	0.364988
794.547	[M+Cl]-	C42H82NO8PCl	PC(O-34:2(OH))	794.547	0.364988
794.547	[M+Cl]-	C42H82NO8PCl	PC(P-34:1(OH))	794.547	0.364988
802.561	[M+Formate]-	C43H81NO10P	PC(34:2)	802.56	0.585626
802.561	[M+Formate]-	C43H81NO10P	PC(O-34:3(OH))	802.56	0.585626
802.561	[M+Formate]-	C43H81NO10P	PC(P-34:2(OH))	802.56	0.585626
810.53	[M+Formate]-	C44H77NO10P	PE(38:5)	810.529	0.801945
810.53	[M+Formate]-	C44H77NO10P	PE(O-38:6(OH))	810.529	0.801945
810.53	[M+Formate]-	C44H77NO10P	PE(P-38:5(OH))	810.529	0.801945
810.53	[M-H]-	C44H77NO10P	PS(38:4)	810.529	0.801945
810.53	[M-H]-	C44H77NO10P	PS(O-38:5(OH))	810.529	0.801945
810.53	[M-H]-	C44H77NO10P	PS(P-38:4(OH))	810.529	0.801945
826.561	[M+Formate]-	C45H81NO10P	PC(36:4)	826.56	0.229868
826.561	[M+Formate]-	C45H81NO10P	PC(O-36:5(OH))	826.56	0.229868
826.561	[M+Formate]-	C45H81NO10P	PC(P-36:4(OH))	826.56	0.229868
830.592	[M+Formate]-	C45H85NO10P	PC(36:2)	830.592	0.156515
830.592	[M+Formate]-	C45H85NO10P	PC(O-36:3(OH))	830.592	0.156515
830.592	[M+Formate]-	C45H85NO10P	PC(P-36:2(OH))	830.592	0.156515
834.529	[M+Formate]-	C46H77NO10P	PE(40:7)	834.529	-0.0718968
834.529	[M-H]-	C46H77NO10P	PS(40:6)	834.529	-0.0718968
834.529	[M-H]-	C46H77NO10P	PS(P-40:6(OH))	834.529	-0.0718968
840.532	[M+Formate]-	C41H78NO16	LacCer(t28:0)	840.533	-1.24921
840.532	[M+Cl]-	C46H80NO8PCl	PC(38:6)	840.532	-0.0594862
840.532	[M+Cl]-	C46H80NO8PCl	PC(P-38:6(OH))	840.532	-0.0594862
844.643	[M+Formate]-	C47H91NO9P	CerP(t46:2)	844.644	-0.769555
844.643	[M+Formate]-	C47H91NO9P	PC(O-38:2)	844.644	-0.769555
844.643	[M+Formate]-	C47H91NO9P	PC(P-38:1)	844.644	-0.769555
844.643	[M-H]-	C47H91NO9P	PE(42:1(OH))	844.644	-0.769555
848.603	[M+Formate]-	C45H87NO11P	PC(36:1(OH))	848.602	0.589204
848.603	[M+Formate]-	C45H87NO11P	PS(O-38:1)	848.602	0.589204
848.603	[M+Formate]-	C45H87NO11P	PS(P-38:0)	848.602	0.589204
850.561	[M+Formate]-	C47H81NO10P	PC(38:6)	850.56	0.11757
850.561	[M+Formate]-	C47H81NO10P	PC(P-38:6(OH))	850.56	0.11757
854.592	[M+Formate]-	C47H85NO10P	PC(38:4)	854.592	-0.140418
854.592	[M+Formate]-	C47H85NO10P	PC(O-38:5(OH))	854.592	-0.140418
854.592	[M+Formate]-	C47H85NO10P	PC(P-38:4(OH))	854.592	-0.140418
868.563	[M+Cl]-	C48H84NO8PCl	PC(40:6)	868.563	0.253292
868.563	[M+Cl]-	C48H84NO8PCl	PC(P-40:6(OH))	868.563	0.253292
868.563	[M+Formate]-	C43H82NO16	LacCer(t30:0)	868.564	1.40462
878.591	[M+Formate]-	C49H85NO10P	PC(40:6)	878.592	-0.512183
878.591	[M+Formate]-	C49H85NO10P	PC(P-40:6(OH))	878.592	-0.512183
883.534	[M+Formate]-	C47H80O13P	PG(40:6(OH))	883.534	0.158455
883.534	[M-H]-	C47H80O13P	PI(38:5)	883.534	0.158455
883.534	[M-H]-	C47H80O13P	PI(O-38:6(OH))	883.534	0.158455
883.534	[M-H]-	C47H80O13P	PI(P-38:5(OH))	883.534	0.158455
885.55	[M+Formate]-	C47H82O13P	PG(40:5(OH))	885.55	0.0564621
885.55	[M-H]-	C47H82O13P	PI(38:4)	885.55	0.0564621
885.55	[M-H]-	C47H82O13P	PI(O-38:5(OH))	885.55	0.0564621
885.55	[M-H]-	C47H82O13P	PI(P-38:4(OH))	885.55	0.0564621
905.625	[M+Formate]-	C52H90O10P	PA(48:6)	905.628	-2.71635
905.625	[M+Formate]-	C52H90O10P	PA(P-48:6(OH))	905.628	-2.71635
905.625	[M-H]-	C52H90O10P	PG(46:6)	905.628	-2.71635
905.625	[M-H]-	C52H90O10P	PG(P-46:6(OH))	905.628	-2.71635

## Sheet: TableSI6_ML_neg_non-unique
Precursor m/z	species	Chemical Composition	Short Name	Theo. m/z	ppm
688.493	[M+Formate]-	C37H71NO8P	CerP(d36:2)	688.492	0.537406
714.508	[M+Formate]-	C39H73NO8P	CerP(d38:3)	714.508	-0.209935
742.539	[M+Formate]-	C41H77NO8P	CerP(d40:3)	742.539	-0.121206
558.333	[M+Cl]-	C26H54NO7PCl	CerP(t26:0)	558.333	-0.376119
568.362	[M+Formate]-	C27H55NO9P	CerP(t26:0)	568.362	0.123161
556.317	[M+Cl]-	C26H52NO7PCl	CerP(t26:1)	556.318	-0.251655
566.346	[M+Formate]-	C27H53NO9P	CerP(t26:1)	566.346	-0.47674
596.392	[M+Formate]-	C29H59NO9P	CerP(t28:0)	596.393	-1.91149
648.425	[M+Formate]-	C33H63NO9P	CerP(t32:2)	648.425	0.169642
445.317	[M+Formate]-	C24H45O7	DG(20:0)	445.317	0.291927
499.364	[M+Formate]-	C28H51O7	DG(24:1)	499.364	-0.740942
527.396	[M+Formate]-	C30H55O7	DG(26:1)	527.395	0.492989
737.536	[M+Formate]-	C46H73O7	DG(42:8)	737.536	-0.135587
523.473	[M-H]-	C33H63O4	DG(O-30:1)	523.473	0.382063
467.411	[M-H]-	C29H55O4	DG(P-26:0)	467.411	0.0213945
495.442	[M-H]-	C31H59O4	DG(P-28:0)	495.442	-0.544968
523.473	[M-H]-	C33H63O4	DG(P-30:0)	523.473	0.382063
431.229	[M+Formate]-	C21H35O9	FA(20:0(OH2,Ke,Ep2))	431.229	-0.278275
431.229	[M+Formate]-	C21H35O9	FA(20:0(OH2,Ke2,Ep))	431.229	-0.278275
409.236	[M+Cl]-	C20H38O6Cl	FA(20:0(OH3,Ep))	409.236	0.146615
431.229	[M+Formate]-	C21H35O9	FA(20:0(OH3,Ep2,cyclo))	431.229	-0.278275
431.229	[M+Formate]-	C21H35O9	FA(20:0(OH3,Ke,Ep,cyclo))	431.229	-0.278275
409.236	[M+Cl]-	C20H38O6Cl	FA(20:0(OH3,Ke))	409.236	0.146615
431.229	[M+Formate]-	C21H35O9	FA(20:0(OH3,Ke2,cyclo))	431.229	-0.278275
409.236	[M+Cl]-	C20H38O6Cl	FA(20:0(OH4,cyclo))	409.236	0.146615
475.182	[M+Formate]-	C21H31O12	FA(20:0(OH4,Ke2,Ep2,cyclo))	475.182	0.547159
431.229	[M+Formate]-	C21H35O9	FA(20:1(OH3,Ep2))	431.229	-0.278275
431.229	[M+Formate]-	C21H35O9	FA(20:1(OH3,Ke,Ep))	431.229	-0.278275
431.229	[M+Formate]-	C21H35O9	FA(20:1(OH3,Ke2))	431.229	-0.278275
431.229	[M+Formate]-	C21H35O9	FA(20:1(OH4,Ep,cyclo))	431.229	-0.278275
431.229	[M+Formate]-	C21H35O9	FA(20:1(OH4,Ke,cyclo))	431.229	-0.278275
473.167	[M+Formate]-	C21H29O12	FA(20:1(OH4,Ke2,Ep2,cyclo))	473.166	0.190208
475.182	[M+Formate]-	C21H31O12	FA(20:1(OH4,Ke2,Ep2))	475.182	0.547159
409.236	[M+Cl]-	C20H38O6Cl	FA(20:1(OH4))	409.236	0.146615
431.229	[M+Formate]-	C21H35O9	FA(20:2(OH4,Ep))	431.229	-0.278275
431.229	[M+Formate]-	C21H35O9	FA(20:2(OH4,Ke))	431.229	-0.278275
473.167	[M+Formate]-	C21H29O12	FA(20:2(OH4,Ke2,Ep2))	473.166	0.190208
457.245	[M+Formate]-	C23H37O9	FA(22:0(OH,Ke2,Ep2))	457.244	1.74961
457.245	[M+Formate]-	C23H37O9	FA(22:0(OH2,Ke,Ep2,cyclo))	457.244	1.74961
457.245	[M+Formate]-	C23H37O9	FA(22:0(OH2,Ke2,Ep,cyclo))	457.244	1.74961
427.234	[M-H]-	C22H35O8	FA(22:0(OH2,Ke2,Ep2))	427.234	0.351096
473.239	[M+Formate]-	C23H37O10	FA(22:0(OH2,Ke2,Ep2))	473.239	-0.274703
401.291	[M-H]-	C22H41O6	FA(22:0(OH3,Ep))	401.291	-0.0747587
427.234	[M-H]-	C22H35O8	FA(22:0(OH3,Ke,Ep2,cyclo))	427.234	0.351096
473.239	[M+Formate]-	C23H37O10	FA(22:0(OH3,Ke,Ep2,cyclo))	473.239	-0.274703
429.25	[M-H]-	C22H37O8	FA(22:0(OH3,Ke,Ep2))	429.249	0.256261
401.291	[M-H]-	C22H41O6	FA(22:0(OH3,Ke))	401.291	-0.0747587
427.234	[M-H]-	C22H35O8	FA(22:0(OH3,Ke2,Ep,cyclo))	427.234	0.351096
473.239	[M+Formate]-	C23H37O10	FA(22:0(OH3,Ke2,Ep,cyclo))	473.239	-0.274703
429.25	[M-H]-	C22H37O8	FA(22:0(OH3,Ke2,Ep))	429.249	0.256261
401.291	[M-H]-	C22H41O6	FA(22:0(OH4,cyclo))	401.291	-0.0747587
417.286	[M-H]-	C22H41O7	FA(22:0(OH4,Ep))	417.286	-0.311537
429.25	[M-H]-	C22H37O8	FA(22:0(OH4,Ep2,cyclo))	429.249	0.256261
429.25	[M-H]-	C22H37O8	FA(22:0(OH4,Ke,Ep,cyclo))	429.249	0.256261
445.245	[M-H]-	C22H37O9	FA(22:0(OH4,Ke,Ep2))	445.244	0.53903
417.286	[M-H]-	C22H41O7	FA(22:0(OH4,Ke))	417.286	-0.311537
429.25	[M-H]-	C22H37O8	FA(22:0(OH4,Ke2,cyclo))	429.249	0.256261
445.245	[M-H]-	C22H37O9	FA(22:0(OH4,Ke2,Ep))	445.244	0.53903
457.245	[M+Formate]-	C23H37O9	FA(22:1(OH2,Ke,Ep2))	457.244	1.74961
457.245	[M+Formate]-	C23H37O9	FA(22:1(OH2,Ke2,Ep))	457.244	1.74961
457.245	[M+Formate]-	C23H37O9	FA(22:1(OH3,Ep2,cyclo))	457.244	1.74961
457.245	[M+Formate]-	C23H37O9	FA(22:1(OH3,Ke,Ep,cyclo))	457.244	1.74961
427.234	[M-H]-	C22H35O8	FA(22:1(OH3,Ke,Ep2))	427.234	0.351096
473.239	[M+Formate]-	C23H37O10	FA(22:1(OH3,Ke,Ep2))	473.239	-0.274703
457.245	[M+Formate]-	C23H37O9	FA(22:1(OH3,Ke2,cyclo))	457.244	1.74961
427.234	[M-H]-	C22H35O8	FA(22:1(OH3,Ke2,Ep))	427.234	0.351096
473.239	[M+Formate]-	C23H37O10	FA(22:1(OH3,Ke2,Ep))	473.239	-0.274703
427.234	[M-H]-	C22H35O8	FA(22:1(OH4,Ep2,cyclo))	427.234	0.351096
473.239	[M+Formate]-	C23H37O10	FA(22:1(OH4,Ep2,cyclo))	473.239	-0.274703
429.25	[M-H]-	C22H37O8	FA(22:1(OH4,Ep2))	429.249	0.256261
427.234	[M-H]-	C22H35O8	FA(22:1(OH4,Ke,Ep,cyclo))	427.234	0.351096
473.239	[M+Formate]-	C23H37O10	FA(22:1(OH4,Ke,Ep,cyclo))	473.239	-0.274703
429.25	[M-H]-	C22H37O8	FA(22:1(OH4,Ke,Ep))	429.249	0.256261
427.234	[M-H]-	C22H35O8	FA(22:1(OH4,Ke2,cyclo))	427.234	0.351096
473.239	[M+Formate]-	C23H37O10	FA(22:1(OH4,Ke2,cyclo))	473.239	-0.274703
429.25	[M-H]-	C22H37O8	FA(22:1(OH4,Ke2))	429.249	0.256261
401.291	[M-H]-	C22H41O6	FA(22:1(OH4))	401.291	-0.0747587
421.188	[M-H]-	C22H29O8	FA(22:2(OH2,Ke2,Ep2,cyclo))	421.187	2.46921
457.245	[M+Formate]-	C23H37O9	FA(22:2(OH3,Ep2))	457.244	1.74961
457.245	[M+Formate]-	C23H37O9	FA(22:2(OH3,Ke,Ep))	457.244	1.74961
457.245	[M+Formate]-	C23H37O9	FA(22:2(OH3,Ke2))	457.244	1.74961
457.245	[M+Formate]-	C23H37O9	FA(22:2(OH4,Ep,cyclo))	457.244	1.74961
427.234	[M-H]-	C22H35O8	FA(22:2(OH4,Ep2))	427.234	0.351096
473.239	[M+Formate]-	C23H37O10	FA(22:2(OH4,Ep2))	473.239	-0.274703
457.245	[M+Formate]-	C23H37O9	FA(22:2(OH4,Ke,cyclo))	457.244	1.74961
427.234	[M-H]-	C22H35O8	FA(22:2(OH4,Ke,Ep))	427.234	0.351096
473.239	[M+Formate]-	C23H37O10	FA(22:2(OH4,Ke,Ep))	473.239	-0.274703
427.234	[M-H]-	C22H35O8	FA(22:2(OH4,Ke2))	427.234	0.351096
473.239	[M+Formate]-	C23H37O10	FA(22:2(OH4,Ke2))	473.239	-0.274703
421.188	[M-H]-	C22H29O8	FA(22:3(OH2,Ke2,Ep2))	421.187	2.46921
421.188	[M-H]-	C22H29O8	FA(22:3(OH3,Ke,Ep2,cyclo))	421.187	2.46921
421.188	[M-H]-	C22H29O8	FA(22:3(OH3,Ke2,Ep,cyclo))	421.187	2.46921
457.245	[M+Formate]-	C23H37O9	FA(22:3(OH4,Ep))	457.244	1.74961
457.245	[M+Formate]-	C23H37O9	FA(22:3(OH4,Ke))	457.244	1.74961
453.132	[M+Cl]-	C22H26O8Cl	FA(22:4(OH2,Ke2,Ep2,cyclo))	453.132	0.0662058
421.188	[M-H]-	C22H29O8	FA(22:4(OH3,Ke,Ep2))	421.187	2.46921
421.188	[M-H]-	C22H29O8	FA(22:4(OH3,Ke2,Ep))	421.187	2.46921
421.188	[M-H]-	C22H29O8	FA(22:4(OH4,Ep2,cyclo))	421.187	2.46921
421.188	[M-H]-	C22H29O8	FA(22:4(OH4,Ke,Ep,cyclo))	421.187	2.46921
421.188	[M-H]-	C22H29O8	FA(22:4(OH4,Ke2,cyclo))	421.187	2.46921
401.198	[M+Formate]-	C23H29O6	FA(22:5(Ep2,cyclo))	401.197	2.26821
401.198	[M+Formate]-	C23H29O6	FA(22:5(Ke,Ep,cyclo))	401.197	2.26821
401.198	[M+Formate]-	C23H29O6	FA(22:5(Ke2,cyclo))	401.197	2.26821
453.132	[M+Cl]-	C22H26O8Cl	FA(22:5(OH2,Ke2,Ep2))	453.132	0.0662058
453.132	[M+Cl]-	C22H26O8Cl	FA(22:5(OH3,Ke,Ep2,cyclo))	453.132	0.0662058
453.132	[M+Cl]-	C22H26O8Cl	FA(22:5(OH3,Ke2,Ep,cyclo))	453.132	0.0662058
421.188	[M-H]-	C22H29O8	FA(22:5(OH4,Ep2))	421.187	2.46921
421.188	[M-H]-	C22H29O8	FA(22:5(OH4,Ke,Ep))	421.187	2.46921
421.188	[M-H]-	C22H29O8	FA(22:5(OH4,Ke2))	421.187	2.46921
401.198	[M+Formate]-	C23H29O6	FA(22:6(Ep2))	401.197	2.26821
401.198	[M+Formate]-	C23H29O6	FA(22:6(Ke,Ep))	401.197	2.26821
401.198	[M+Formate]-	C23H29O6	FA(22:6(Ke2))	401.197	2.26821
401.198	[M+Formate]-	C23H29O6	FA(22:6(OH,Ep,cyclo))	401.197	2.26821
401.198	[M+Formate]-	C23H29O6	FA(22:6(OH,Ke,cyclo))	401.197	2.26821
453.132	[M+Cl]-	C22H26O8Cl	FA(22:6(OH3,Ke,Ep2))	453.132	0.0662058
453.132	[M+Cl]-	C22H26O8Cl	FA(22:6(OH3,Ke2,Ep))	453.132	0.0662058
453.132	[M+Cl]-	C22H26O8Cl	FA(22:6(OH4,Ep2,cyclo))	453.132	0.0662058
453.132	[M+Cl]-	C22H26O8Cl	FA(22:6(OH4,Ke,Ep,cyclo))	453.132	0.0662058
453.132	[M+Cl]-	C22H26O8Cl	FA(22:6(OH4,Ke2,cyclo))	453.132	0.0662058
411.348	[M+Formate]-	C25H47O4	FA(24:0(cyclo))	411.348	0.461896
457.317	[M+Formate]-	C25H45O7	FA(24:0(OH,Ep2))	457.317	-0.371733
457.317	[M+Formate]-	C25H45O7	FA(24:0(OH,Ke,Ep))	457.317	-0.371733
471.297	[M+Formate]-	C25H43O8	FA(24:0(OH,Ke,Ep2))	471.296	1.14578
471.297	[M+Formate]-	C25H43O8	FA(24:0(OH,Ke2,Ep))	471.296	1.14578
457.317	[M+Formate]-	C25H45O7	FA(24:0(OH,Ke2))	457.317	-0.371733
457.317	[M+Formate]-	C25H45O7	FA(24:0(OH2,Ep,cyclo))	457.317	-0.371733
471.297	[M+Formate]-	C25H43O8	FA(24:0(OH2,Ep2,cyclo))	471.296	1.14578
457.317	[M+Formate]-	C25H45O7	FA(24:0(OH2,Ke,cyclo))	457.317	-0.371733
471.297	[M+Formate]-	C25H43O8	FA(24:0(OH2,Ke,Ep,cyclo))	471.296	1.14578
477.262	[M+Cl]-	C24H42O7Cl	FA(24:0(OH2,Ke,Ep2))	477.262	-0.649538
487.292	[M+Formate]-	C25H43O9	FA(24:0(OH2,Ke,Ep2))	487.291	1.21077
471.297	[M+Formate]-	C25H43O8	FA(24:0(OH2,Ke2,cyclo))	471.296	1.14578
477.262	[M+Cl]-	C24H42O7Cl	FA(24:0(OH2,Ke2,Ep))	477.262	-0.649538
487.292	[M+Formate]-	C25H43O9	FA(24:0(OH2,Ke2,Ep))	487.291	1.21077
453.25	[M-H]-	C24H37O8	FA(24:0(OH2,Ke2,Ep2,cyclo))	453.249	0.286818
455.265	[M-H]-	C24H39O8	FA(24:0(OH2,Ke2,Ep2))	455.265	0.0219652
477.262	[M+Cl]-	C24H42O7Cl	FA(24:0(OH3,Ep2,cyclo))	477.262	-0.649538
487.292	[M+Formate]-	C25H43O9	FA(24:0(OH3,Ep2,cyclo))	487.291	1.21077
443.302	[M-H]-	C24H43O7	FA(24:0(OH3,Ep2))	443.301	0.924879
479.278	[M+Cl]-	C24H44O7Cl	FA(24:0(OH3,Ep2))	479.278	-0.0625941
489.307	[M+Formate]-	C25H45O9	FA(24:0(OH3,Ep2))	489.307	-0.0408741
477.262	[M+Cl]-	C24H42O7Cl	FA(24:0(OH3,Ke,Ep,cyclo))	477.262	-0.649538
487.292	[M+Formate]-	C25H43O9	FA(24:0(OH3,Ke,Ep,cyclo))	487.291	1.21077
443.302	[M-H]-	C24H43O7	FA(24:0(OH3,Ke,Ep))	443.301	0.924879
479.278	[M+Cl]-	C24H44O7Cl	FA(24:0(OH3,Ke,Ep))	479.278	-0.0625941
489.307	[M+Formate]-	C25H45O9	FA(24:0(OH3,Ke,Ep))	489.307	-0.0408741
455.265	[M-H]-	C24H39O8	FA(24:0(OH3,Ke,Ep2,cyclo))	455.265	0.0219652
457.281	[M-H]-	C24H41O8	FA(24:0(OH3,Ke,Ep2))	457.281	0.0874736
477.262	[M+Cl]-	C24H42O7Cl	FA(24:0(OH3,Ke2,cyclo))	477.262	-0.649538
487.292	[M+Formate]-	C25H43O9	FA(24:0(OH3,Ke2,cyclo))	487.291	1.21077
455.265	[M-H]-	C24H39O8	FA(24:0(OH3,Ke2,Ep,cyclo))	455.265	0.0219652
457.281	[M-H]-	C24H41O8	FA(24:0(OH3,Ke2,Ep))	457.281	0.0874736
443.302	[M-H]-	C24H43O7	FA(24:0(OH3,Ke2))	443.301	0.924879
479.278	[M+Cl]-	C24H44O7Cl	FA(24:0(OH3,Ke2))	479.278	-0.0625941
489.307	[M+Formate]-	C25H45O9	FA(24:0(OH3,Ke2))	489.307	-0.0408741
443.302	[M-H]-	C24H43O7	FA(24:0(OH4,Ep,cyclo))	443.301	0.924879
479.278	[M+Cl]-	C24H44O7Cl	FA(24:0(OH4,Ep,cyclo))	479.278	-0.0625941
489.307	[M+Formate]-	C25H45O9	FA(24:0(OH4,Ep,cyclo))	489.307	-0.0408741
445.317	[M-H]-	C24H45O7	FA(24:0(OH4,Ep))	445.317	0.291927
457.281	[M-H]-	C24H41O8	FA(24:0(OH4,Ep2,cyclo))	457.281	0.0874736
459.297	[M-H]-	C24H43O8	FA(24:0(OH4,Ep2))	459.296	0.304814
443.302	[M-H]-	C24H43O7	FA(24:0(OH4,Ke,cyclo))	443.301	0.924879
479.278	[M+Cl]-	C24H44O7Cl	FA(24:0(OH4,Ke,cyclo))	479.278	-0.0625941
489.307	[M+Formate]-	C25H45O9	FA(24:0(OH4,Ke,cyclo))	489.307	-0.0408741
457.281	[M-H]-	C24H41O8	FA(24:0(OH4,Ke,Ep,cyclo))	457.281	0.0874736
459.297	[M-H]-	C24H43O8	FA(24:0(OH4,Ke,Ep))	459.296	0.304814
473.276	[M-H]-	C24H41O9	FA(24:0(OH4,Ke,Ep2))	473.276	0
445.317	[M-H]-	C24H45O7	FA(24:0(OH4,Ke))	445.317	0.291927
457.281	[M-H]-	C24H41O8	FA(24:0(OH4,Ke2,cyclo))	457.281	0.0874736
473.276	[M-H]-	C24H41O9	FA(24:0(OH4,Ke2,Ep))	473.276	0
459.297	[M-H]-	C24H43O8	FA(24:0(OH4,Ke2))	459.296	0.304814
457.317	[M+Formate]-	C25H45O7	FA(24:1(OH2,Ep))	457.317	-0.371733
471.297	[M+Formate]-	C25H43O8	FA(24:1(OH2,Ep2))	471.296	1.14578
471.297	[M+Formate]-	C25H43O8	FA(24:1(OH2,Ke,Ep))	471.296	1.14578
457.317	[M+Formate]-	C25H45O7	FA(24:1(OH2,Ke))	457.317	-0.371733
453.25	[M-H]-	C24H37O8	FA(24:1(OH2,Ke2,Ep2))	453.249	0.286818
471.297	[M+Formate]-	C25H43O8	FA(24:1(OH2,Ke2))	471.296	1.14578
457.317	[M+Formate]-	C25H45O7	FA(24:1(OH3,cyclo))	457.317	-0.371733
471.297	[M+Formate]-	C25H43O8	FA(24:1(OH3,Ep,cyclo))	471.296	1.14578
477.262	[M+Cl]-	C24H42O7Cl	FA(24:1(OH3,Ep2))	477.262	-0.649538
487.292	[M+Formate]-	C25H43O9	FA(24:1(OH3,Ep2))	487.291	1.21077
471.297	[M+Formate]-	C25H43O8	FA(24:1(OH3,Ke,cyclo))	471.296	1.14578
477.262	[M+Cl]-	C24H42O7Cl	FA(24:1(OH3,Ke,Ep))	477.262	-0.649538
487.292	[M+Formate]-	C25H43O9	FA(24:1(OH3,Ke,Ep))	487.291	1.21077
453.25	[M-H]-	C24H37O8	FA(24:1(OH3,Ke,Ep2,cyclo))	453.249	0.286818
455.265	[M-H]-	C24H39O8	FA(24:1(OH3,Ke,Ep2))	455.265	0.0219652
453.25	[M-H]-	C24H37O8	FA(24:1(OH3,Ke2,Ep,cyclo))	453.249	0.286818
455.265	[M-H]-	C24H39O8	FA(24:1(OH3,Ke2,Ep))	455.265	0.0219652
477.262	[M+Cl]-	C24H42O7Cl	FA(24:1(OH3,Ke2))	477.262	-0.649538
487.292	[M+Formate]-	C25H43O9	FA(24:1(OH3,Ke2))	487.291	1.21077
477.262	[M+Cl]-	C24H42O7Cl	FA(24:1(OH4,Ep,cyclo))	477.262	-0.649538
487.292	[M+Formate]-	C25H43O9	FA(24:1(OH4,Ep,cyclo))	487.291	1.21077
443.302	[M-H]-	C24H43O7	FA(24:1(OH4,Ep))	443.301	0.924879
479.278	[M+Cl]-	C24H44O7Cl	FA(24:1(OH4,Ep))	479.278	-0.0625941
489.307	[M+Formate]-	C25H45O9	FA(24:1(OH4,Ep))	489.307	-0.0408741
455.265	[M-H]-	C24H39O8	FA(24:1(OH4,Ep2,cyclo))	455.265	0.0219652
457.281	[M-H]-	C24H41O8	FA(24:1(OH4,Ep2))	457.281	0.0874736
477.262	[M+Cl]-	C24H42O7Cl	FA(24:1(OH4,Ke,cyclo))	477.262	-0.649538
487.292	[M+Formate]-	C25H43O9	FA(24:1(OH4,Ke,cyclo))	487.291	1.21077
455.265	[M-H]-	C24H39O8	FA(24:1(OH4,Ke,Ep,cyclo))	455.265	0.0219652
457.281	[M-H]-	C24H41O8	FA(24:1(OH4,Ke,Ep))	457.281	0.0874736
443.302	[M-H]-	C24H43O7	FA(24:1(OH4,Ke))	443.301	0.924879
479.278	[M+Cl]-	C24H44O7Cl	FA(24:1(OH4,Ke))	479.278	-0.0625941
489.307	[M+Formate]-	C25H45O9	FA(24:1(OH4,Ke))	489.307	-0.0408741
455.265	[M-H]-	C24H39O8	FA(24:1(OH4,Ke2,cyclo))	455.265	0.0219652
457.281	[M-H]-	C24H41O8	FA(24:1(OH4,Ke2))	457.281	0.0874736
411.348	[M+Formate]-	C25H47O4	FA(24:1)	411.348	0.461896
471.297	[M+Formate]-	C25H43O8	FA(24:2(OH3,Ep))	471.296	1.14578
453.25	[M-H]-	C24H37O8	FA(24:2(OH3,Ke,Ep2))	453.249	0.286818
471.297	[M+Formate]-	C25H43O8	FA(24:2(OH3,Ke))	471.296	1.14578
453.25	[M-H]-	C24H37O8	FA(24:2(OH3,Ke2,Ep))	453.249	0.286818
465.214	[M-H]-	C24H33O9	FA(24:2(OH3,Ke2,Ep2,cyclo))	465.213	1.80562
457.317	[M+Formate]-	C25H45O7	FA(24:2(OH3))	457.317	-0.371733
471.297	[M+Formate]-	C25H43O8	FA(24:2(OH4,cyclo))	471.296	1.14578
477.262	[M+Cl]-	C24H42O7Cl	FA(24:2(OH4,Ep))	477.262	-0.649538
487.292	[M+Formate]-	C25H43O9	FA(24:2(OH4,Ep))	487.291	1.21077
453.25	[M-H]-	C24H37O8	FA(24:2(OH4,Ep2,cyclo))	453.249	0.286818
455.265	[M-H]-	C24H39O8	FA(24:2(OH4,Ep2))	455.265	0.0219652
453.25	[M-H]-	C24H37O8	FA(24:2(OH4,Ke,Ep,cyclo))	453.249	0.286818
455.265	[M-H]-	C24H39O8	FA(24:2(OH4,Ke,Ep))	455.265	0.0219652
477.262	[M+Cl]-	C24H42O7Cl	FA(24:2(OH4,Ke))	477.262	-0.649538
487.292	[M+Formate]-	C25H43O9	FA(24:2(OH4,Ke))	487.291	1.21077
453.25	[M-H]-	C24H37O8	FA(24:2(OH4,Ke2,cyclo))	453.249	0.286818
455.265	[M-H]-	C24H39O8	FA(24:2(OH4,Ke2))	455.265	0.0219652
465.214	[M-H]-	C24H33O9	FA(24:3(OH3,Ke2,Ep2))	465.213	1.80562
453.25	[M-H]-	C24H37O8	FA(24:3(OH4,Ep2))	453.249	0.286818
453.25	[M-H]-	C24H37O8	FA(24:3(OH4,Ke,Ep))	453.249	0.286818
465.214	[M-H]-	C24H33O9	FA(24:3(OH4,Ke,Ep2,cyclo))	465.213	1.80562
465.214	[M-H]-	C24H33O9	FA(24:3(OH4,Ke2,Ep,cyclo))	465.213	1.80562
479.194	[M-H]-	C24H31O10	FA(24:3(OH4,Ke2,Ep2,cyclo))	479.192	2.98419
453.25	[M-H]-	C24H37O8	FA(24:3(OH4,Ke2))	453.249	0.286818
471.297	[M+Formate]-	C25H43O8	FA(24:3(OH4))	471.296	1.14578
465.214	[M-H]-	C24H33O9	FA(24:4(OH4,Ke,Ep2))	465.213	1.80562
465.214	[M-H]-	C24H33O9	FA(24:4(OH4,Ke2,Ep))	465.213	1.80562
479.194	[M-H]-	C24H31O10	FA(24:4(OH4,Ke2,Ep2))	479.192	2.98419
511.136	[M+Cl]-	C24H28O10Cl	FA(24:5(OH4,Ke2,Ep2,cyclo))	511.138	-2.66073
521.166	[M+Formate]-	C25H29O12	FA(24:5(OH4,Ke2,Ep2,cyclo))	521.167	-0.24944
511.136	[M+Cl]-	C24H28O10Cl	FA(24:6(OH4,Ke2,Ep2))	511.138	-2.66073
521.166	[M+Formate]-	C25H29O12	FA(24:6(OH4,Ke2,Ep2))	521.167	-0.24944
439.379	[M+Formate]-	C27H51O4	FA(26:0(cyclo))	439.379	-0.978653
425.363	[M-H]-	C26H49O4	FA(26:0(OH,Ep))	425.364	-0.235093
485.348	[M+Formate]-	C27H49O7	FA(26:0(OH,Ep2))	485.348	-0.638716
485.348	[M+Formate]-	C27H49O7	FA(26:0(OH,Ke,Ep))	485.348	-0.638716
425.363	[M-H]-	C26H49O4	FA(26:0(OH,Ke))	425.364	-0.235093
467.302	[M-H]-	C26H43O7	FA(26:0(OH,Ke2,Ep2))	467.301	0.38519
485.348	[M+Formate]-	C27H49O7	FA(26:0(OH,Ke2))	485.348	-0.638716
425.363	[M-H]-	C26H49O4	FA(26:0(OH2,cyclo))	425.364	-0.235093
485.348	[M+Formate]-	C27H49O7	FA(26:0(OH2,Ep,cyclo))	485.348	-0.638716
485.348	[M+Formate]-	C27H49O7	FA(26:0(OH2,Ke,cyclo))	485.348	-0.638716
467.302	[M-H]-	C26H43O7	FA(26:0(OH2,Ke,Ep2,cyclo))	467.301	0.38519
467.302	[M-H]-	C26H43O7	FA(26:0(OH2,Ke2,Ep,cyclo))	467.301	0.38519
481.281	[M-H]-	C26H41O8	FA(26:0(OH2,Ke2,Ep2,cyclo))	481.281	1.14278
483.296	[M-H]-	C26H43O8	FA(26:0(OH2,Ke2,Ep2))	483.296	-0.0620737
471.333	[M-H]-	C26H47O7	FA(26:0(OH3,Ep2))	471.333	0.95474
471.333	[M-H]-	C26H47O7	FA(26:0(OH3,Ke,Ep))	471.333	0.95474
483.296	[M-H]-	C26H43O8	FA(26:0(OH3,Ke,Ep2,cyclo))	483.296	-0.0620737
485.312	[M-H]-	C26H45O8	FA(26:0(OH3,Ke,Ep2))	485.312	0.391501
483.296	[M-H]-	C26H43O8	FA(26:0(OH3,Ke2,Ep,cyclo))	483.296	-0.0620737
485.312	[M-H]-	C26H45O8	FA(26:0(OH3,Ke2,Ep))	485.312	0.391501
499.291	[M-H]-	C26H43O9	FA(26:0(OH3,Ke2,Ep2))	499.291	-0.320454
471.333	[M-H]-	C26H47O7	FA(26:0(OH3,Ke2))	471.333	0.95474
471.333	[M-H]-	C26H47O7	FA(26:0(OH4,Ep,cyclo))	471.333	0.95474
485.312	[M-H]-	C26H45O8	FA(26:0(OH4,Ep2,cyclo))	485.312	0.391501
487.328	[M-H]-	C26H47O8	FA(26:0(OH4,Ep2))	487.328	0.246241
471.333	[M-H]-	C26H47O7	FA(26:0(OH4,Ke,cyclo))	471.333	0.95474
485.312	[M-H]-	C26H45O8	FA(26:0(OH4,Ke,Ep,cyclo))	485.312	0.391501
487.328	[M-H]-	C26H47O8	FA(26:0(OH4,Ke,Ep))	487.328	0.246241
499.291	[M-H]-	C26H43O9	FA(26:0(OH4,Ke,Ep2,cyclo))	499.291	-0.320454
501.307	[M-H]-	C26H45O9	FA(26:0(OH4,Ke,Ep2))	501.307	-0.299218
485.312	[M-H]-	C26H45O8	FA(26:0(OH4,Ke2,cyclo))	485.312	0.391501
499.291	[M-H]-	C26H43O9	FA(26:0(OH4,Ke2,Ep,cyclo))	499.291	-0.320454
501.307	[M-H]-	C26H45O9	FA(26:0(OH4,Ke2,Ep))	501.307	-0.299218
487.328	[M-H]-	C26H47O8	FA(26:0(OH4,Ke2))	487.328	0.246241
447.275	[M-H]-	C26H39O6	FA(26:1(Ke2,Ep2,cyclo))	447.275	0.245934
485.348	[M+Formate]-	C27H49O7	FA(26:1(OH2,Ep))	485.348	-0.638716
467.302	[M-H]-	C26H43O7	FA(26:1(OH2,Ke,Ep2))	467.301	0.38519
485.348	[M+Formate]-	C27H49O7	FA(26:1(OH2,Ke))	485.348	-0.638716
467.302	[M-H]-	C26H43O7	FA(26:1(OH2,Ke2,Ep))	467.301	0.38519
481.281	[M-H]-	C26H41O8	FA(26:1(OH2,Ke2,Ep2))	481.281	1.14278
425.363	[M-H]-	C26H49O4	FA(26:1(OH2))	425.364	-0.235093
485.348	[M+Formate]-	C27H49O7	FA(26:1(OH3,cyclo))	485.348	-0.638716
467.302	[M-H]-	C26H43O7	FA(26:1(OH3,Ep2,cyclo))	467.301	0.38519
467.302	[M-H]-	C26H43O7	FA(26:1(OH3,Ke,Ep,cyclo))	467.301	0.38519
481.281	[M-H]-	C26H41O8	FA(26:1(OH3,Ke,Ep2,cyclo))	481.281	1.14278
483.296	[M-H]-	C26H43O8	FA(26:1(OH3,Ke,Ep2))	483.296	-0.0620737
467.302	[M-H]-	C26H43O7	FA(26:1(OH3,Ke2,cyclo))	467.301	0.38519
481.281	[M-H]-	C26H41O8	FA(26:1(OH3,Ke2,Ep,cyclo))	481.281	1.14278
483.296	[M-H]-	C26H43O8	FA(26:1(OH3,Ke2,Ep))	483.296	-0.0620737
471.333	[M-H]-	C26H47O7	FA(26:1(OH4,Ep))	471.333	0.95474
483.296	[M-H]-	C26H43O8	FA(26:1(OH4,Ep2,cyclo))	483.296	-0.0620737
485.312	[M-H]-	C26H45O8	FA(26:1(OH4,Ep2))	485.312	0.391501
483.296	[M-H]-	C26H43O8	FA(26:1(OH4,Ke,Ep,cyclo))	483.296	-0.0620737
485.312	[M-H]-	C26H45O8	FA(26:1(OH4,Ke,Ep))	485.312	0.391501
499.291	[M-H]-	C26H43O9	FA(26:1(OH4,Ke,Ep2))	499.291	-0.320454
471.333	[M-H]-	C26H47O7	FA(26:1(OH4,Ke))	471.333	0.95474
483.296	[M-H]-	C26H43O8	FA(26:1(OH4,Ke2,cyclo))	483.296	-0.0620737
499.291	[M-H]-	C26H43O9	FA(26:1(OH4,Ke2,Ep))	499.291	-0.320454
485.312	[M-H]-	C26H45O8	FA(26:1(OH4,Ke2))	485.312	0.391501
439.379	[M+Formate]-	C27H51O4	FA(26:1)	439.379	-0.978653
447.275	[M-H]-	C26H39O6	FA(26:2(Ke2,Ep2))	447.275	0.245934
447.275	[M-H]-	C26H39O6	FA(26:2(OH,Ke,Ep2,cyclo))	447.275	0.245934
447.275	[M-H]-	C26H39O6	FA(26:2(OH,Ke2,Ep,cyclo))	447.275	0.245934
477.249	[M-H]-	C26H37O8	FA(26:2(OH2,Ke2,Ep2,cyclo))	477.249	-0.272394
467.302	[M-H]-	C26H43O7	FA(26:2(OH3,Ep2))	467.301	0.38519
467.302	[M-H]-	C26H43O7	FA(26:2(OH3,Ke,Ep))	467.301	0.38519
481.281	[M-H]-	C26H41O8	FA(26:2(OH3,Ke,Ep2))	481.281	1.14278
481.281	[M-H]-	C26H41O8	FA(26:2(OH3,Ke2,Ep))	481.281	1.14278
467.302	[M-H]-	C26H43O7	FA(26:2(OH3,Ke2))	467.301	0.38519
485.348	[M+Formate]-	C27H49O7	FA(26:2(OH3))	485.348	-0.638716
467.302	[M-H]-	C26H43O7	FA(26:2(OH4,Ep,cyclo))	467.301	0.38519
481.281	[M-H]-	C26H41O8	FA(26:2(OH4,Ep2,cyclo))	481.281	1.14278
483.296	[M-H]-	C26H43O8	FA(26:2(OH4,Ep2))	483.296	-0.0620737
467.302	[M-H]-	C26H43O7	FA(26:2(OH4,Ke,cyclo))	467.301	0.38519
481.281	[M-H]-	C26H41O8	FA(26:2(OH4,Ke,Ep,cyclo))	481.281	1.14278
483.296	[M-H]-	C26H43O8	FA(26:2(OH4,Ke,Ep))	483.296	-0.0620737
481.281	[M-H]-	C26H41O8	FA(26:2(OH4,Ke2,cyclo))	481.281	1.14278
509.24	[M-H]-	C26H37O10	FA(26:2(OH4,Ke2,Ep2,cyclo))	509.239	2.00299
483.296	[M-H]-	C26H43O8	FA(26:2(OH4,Ke2))	483.296	-0.0620737
433.332	[M+Formate]-	C27H45O4	FA(26:3(cyclo))	433.332	-0.0692309
447.275	[M-H]-	C26H39O6	FA(26:3(OH,Ke,Ep2))	447.275	0.245934
447.275	[M-H]-	C26H39O6	FA(26:3(OH,Ke2,Ep))	447.275	0.245934
447.275	[M-H]-	C26H39O6	FA(26:3(OH2,Ep2,cyclo))	447.275	0.245934
447.275	[M-H]-	C26H39O6	FA(26:3(OH2,Ke,Ep,cyclo))	447.275	0.245934
447.275	[M-H]-	C26H39O6	FA(26:3(OH2,Ke2,cyclo))	447.275	0.245934
477.249	[M-H]-	C26H37O8	FA(26:3(OH2,Ke2,Ep2))	477.249	-0.272394
477.249	[M-H]-	C26H37O8	FA(26:3(OH3,Ke,Ep2,cyclo))	477.249	-0.272394
477.249	[M-H]-	C26H37O8	FA(26:3(OH3,Ke2,Ep,cyclo))	477.249	-0.272394
467.302	[M-H]-	C26H43O7	FA(26:3(OH4,Ep))	467.301	0.38519
481.281	[M-H]-	C26H41O8	FA(26:3(OH4,Ep2))	481.281	1.14278
481.281	[M-H]-	C26H41O8	FA(26:3(OH4,Ke,Ep))	481.281	1.14278
467.302	[M-H]-	C26H43O7	FA(26:3(OH4,Ke))	467.301	0.38519
509.24	[M-H]-	C26H37O10	FA(26:3(OH4,Ke2,Ep2))	509.239	2.00299
481.281	[M-H]-	C26H41O8	FA(26:3(OH4,Ke2))	481.281	1.14278
447.275	[M-H]-	C26H39O6	FA(26:4(OH2,Ep2))	447.275	0.245934
447.275	[M-H]-	C26H39O6	FA(26:4(OH2,Ke,Ep))	447.275	0.245934
447.275	[M-H]-	C26H39O6	FA(26:4(OH2,Ke2))	447.275	0.245934
447.275	[M-H]-	C26H39O6	FA(26:4(OH3,Ep,cyclo))	447.275	0.245934
447.275	[M-H]-	C26H39O6	FA(26:4(OH3,Ke,cyclo))	447.275	0.245934
477.249	[M-H]-	C26H37O8	FA(26:4(OH3,Ke,Ep2))	477.249	-0.272394
477.249	[M-H]-	C26H37O8	FA(26:4(OH3,Ke2,Ep))	477.249	-0.272394
477.249	[M-H]-	C26H37O8	FA(26:4(OH4,Ep2,cyclo))	477.249	-0.272394
477.249	[M-H]-	C26H37O8	FA(26:4(OH4,Ke,Ep,cyclo))	477.249	-0.272394
477.249	[M-H]-	C26H37O8	FA(26:4(OH4,Ke2,cyclo))	477.249	-0.272394
433.332	[M+Formate]-	C27H45O4	FA(26:4)	433.332	-0.0692309
447.275	[M-H]-	C26H39O6	FA(26:5(OH3,Ep))	447.275	0.245934
447.275	[M-H]-	C26H39O6	FA(26:5(OH3,Ke))	447.275	0.245934
447.275	[M-H]-	C26H39O6	FA(26:5(OH4,cyclo))	447.275	0.245934
477.249	[M-H]-	C26H37O8	FA(26:5(OH4,Ep2))	477.249	-0.272394
477.249	[M-H]-	C26H37O8	FA(26:5(OH4,Ke,Ep))	477.249	-0.272394
477.249	[M-H]-	C26H37O8	FA(26:5(OH4,Ke2))	477.249	-0.272394
459.195	[M+Cl]-	C26H32O5Cl	FA(26:6(Ke,Ep2,cyclo))	459.194	1.61152
459.195	[M+Cl]-	C26H32O5Cl	FA(26:6(Ke2,Ep,cyclo))	459.194	1.61152
447.275	[M-H]-	C26H39O6	FA(26:6(OH4))	447.275	0.245934
467.411	[M+Formate]-	C29H55O4	FA(28:0(cyclo))	467.411	0.0213945
453.395	[M-H]-	C28H53O4	FA(28:0(OH,Ep))	453.395	-0.617563
453.395	[M-H]-	C28H53O4	FA(28:0(OH,Ke))	453.395	-0.617563
453.395	[M-H]-	C28H53O4	FA(28:0(OH2,cyclo))	453.395	-0.617563
509.312	[M-H]-	C28H45O8	FA(28:0(OH2,Ke2,Ep2,cyclo))	509.312	0.333784
511.327	[M-H]-	C28H47O8	FA(28:0(OH2,Ke2,Ep2))	511.328	-0.645379
557.332	[M+Formate]-	C29H49O10	FA(28:0(OH2,Ke2,Ep2))	557.333	-2.24282
499.364	[M-H]-	C28H51O7	FA(28:0(OH3,Ep2))	499.364	-0.740942
499.364	[M-H]-	C28H51O7	FA(28:0(OH3,Ke,Ep))	499.364	-0.740942
511.327	[M-H]-	C28H47O8	FA(28:0(OH3,Ke,Ep2,cyclo))	511.328	-0.645379
557.332	[M+Formate]-	C29H49O10	FA(28:0(OH3,Ke,Ep2,cyclo))	557.333	-2.24282
511.327	[M-H]-	C28H47O8	FA(28:0(OH3,Ke2,Ep,cyclo))	511.328	-0.645379
557.332	[M+Formate]-	C29H49O10	FA(28:0(OH3,Ke2,Ep,cyclo))	557.333	-2.24282
571.312	[M+Formate]-	C29H47O11	FA(28:0(OH3,Ke2,Ep2,cyclo))	571.312	-1.29526
573.328	[M+Formate]-	C29H49O11	FA(28:0(OH3,Ke2,Ep2))	573.328	0.34884
499.364	[M-H]-	C28H51O7	FA(28:0(OH3,Ke2))	499.364	-0.740942
499.364	[M-H]-	C28H51O7	FA(28:0(OH4,Ep,cyclo))	499.364	-0.740942
561.365	[M+Formate]-	C29H53O10	FA(28:0(OH4,Ep2))	561.364	1.88826
499.364	[M-H]-	C28H51O7	FA(28:0(OH4,Ke,cyclo))	499.364	-0.740942
561.365	[M+Formate]-	C29H53O10	FA(28:0(OH4,Ke,Ep))	561.364	1.88826
573.328	[M+Formate]-	C29H49O11	FA(28:0(OH4,Ke,Ep2,cyclo))	573.328	0.34884
573.328	[M+Formate]-	C29H49O11	FA(28:0(OH4,Ke2,Ep,cyclo))	573.328	0.34884
587.307	[M+Formate]-	C29H47O12	FA(28:0(OH4,Ke2,Ep2,cyclo))	587.307	-0.102161
561.365	[M+Formate]-	C29H53O10	FA(28:0(OH4,Ke2))	561.364	1.88826
491.301	[M-H]-	C28H43O7	FA(28:1(OH,Ke2,Ep2,cyclo))	491.301	-0.590269
507.297	[M-H]-	C28H43O8	FA(28:1(OH2,Ke2,Ep2,cyclo))	507.296	0.216836
509.312	[M-H]-	C28H45O8	FA(28:1(OH2,Ke2,Ep2))	509.312	0.333784
453.395	[M-H]-	C28H53O4	FA(28:1(OH2))	453.395	-0.617563
509.312	[M-H]-	C28H45O8	FA(28:1(OH3,Ke,Ep2,cyclo))	509.312	0.333784
511.327	[M-H]-	C28H47O8	FA(28:1(OH3,Ke,Ep2))	511.328	-0.645379
557.332	[M+Formate]-	C29H49O10	FA(28:1(OH3,Ke,Ep2))	557.333	-2.24282
509.312	[M-H]-	C28H45O8	FA(28:1(OH3,Ke2,Ep,cyclo))	509.312	0.333784
511.327	[M-H]-	C28H47O8	FA(28:1(OH3,Ke2,Ep))	511.328	-0.645379
557.332	[M+Formate]-	C29H49O10	FA(28:1(OH3,Ke2,Ep))	557.333	-2.24282
523.292	[M-H]-	C28H43O9	FA(28:1(OH3,Ke2,Ep2,cyclo))	523.291	1.01282
571.312	[M+Formate]-	C29H47O11	FA(28:1(OH3,Ke2,Ep2))	571.312	-1.29526
499.364	[M-H]-	C28H51O7	FA(28:1(OH4,Ep))	499.364	-0.740942
511.327	[M-H]-	C28H47O8	FA(28:1(OH4,Ep2,cyclo))	511.328	-0.645379
557.332	[M+Formate]-	C29H49O10	FA(28:1(OH4,Ep2,cyclo))	557.333	-2.24282
511.327	[M-H]-	C28H47O8	FA(28:1(OH4,Ke,Ep,cyclo))	511.328	-0.645379
557.332	[M+Formate]-	C29H49O10	FA(28:1(OH4,Ke,Ep,cyclo))	557.333	-2.24282
571.312	[M+Formate]-	C29H47O11	FA(28:1(OH4,Ke,Ep2,cyclo))	571.312	-1.29526
573.328	[M+Formate]-	C29H49O11	FA(28:1(OH4,Ke,Ep2))	573.328	0.34884
499.364	[M-H]-	C28H51O7	FA(28:1(OH4,Ke))	499.364	-0.740942
511.327	[M-H]-	C28H47O8	FA(28:1(OH4,Ke2,cyclo))	511.328	-0.645379
557.332	[M+Formate]-	C29H49O10	FA(28:1(OH4,Ke2,cyclo))	557.333	-2.24282
571.312	[M+Formate]-	C29H47O11	FA(28:1(OH4,Ke2,Ep,cyclo))	571.312	-1.29526
573.328	[M+Formate]-	C29H49O11	FA(28:1(OH4,Ke2,Ep))	573.328	0.34884
587.307	[M+Formate]-	C29H47O12	FA(28:1(OH4,Ke2,Ep2))	587.307	-0.102161
467.411	[M+Formate]-	C29H55O4	FA(28:1)	467.411	0.0213945
491.301	[M-H]-	C28H43O7	FA(28:2(OH,Ke2,Ep2))	491.301	-0.590269
491.301	[M-H]-	C28H43O7	FA(28:2(OH2,Ke,Ep2,cyclo))	491.301	-0.590269
491.301	[M-H]-	C28H43O7	FA(28:2(OH2,Ke2,Ep,cyclo))	491.301	-0.590269
507.297	[M-H]-	C28H43O8	FA(28:2(OH2,Ke2,Ep2))	507.296	0.216836
507.297	[M-H]-	C28H43O8	FA(28:2(OH3,Ke,Ep2,cyclo))	507.296	0.216836
509.312	[M-H]-	C28H45O8	FA(28:2(OH3,Ke,Ep2))	509.312	0.333784
507.297	[M-H]-	C28H43O8	FA(28:2(OH3,Ke2,Ep,cyclo))	507.296	0.216836
509.312	[M-H]-	C28H45O8	FA(28:2(OH3,Ke2,Ep))	509.312	0.333784
523.292	[M-H]-	C28H43O9	FA(28:2(OH3,Ke2,Ep2))	523.291	1.01282
509.312	[M-H]-	C28H45O8	FA(28:2(OH4,Ep2,cyclo))	509.312	0.333784
511.327	[M-H]-	C28H47O8	FA(28:2(OH4,Ep2))	511.328	-0.645379
557.332	[M+Formate]-	C29H49O10	FA(28:2(OH4,Ep2))	557.333	-2.24282
509.312	[M-H]-	C28H45O8	FA(28:2(OH4,Ke,Ep,cyclo))	509.312	0.333784
511.327	[M-H]-	C28H47O8	FA(28:2(OH4,Ke,Ep))	511.328	-0.645379
557.332	[M+Formate]-	C29H49O10	FA(28:2(OH4,Ke,Ep))	557.333	-2.24282
523.292	[M-H]-	C28H43O9	FA(28:2(OH4,Ke,Ep2,cyclo))	523.291	1.01282
571.312	[M+Formate]-	C29H47O11	FA(28:2(OH4,Ke,Ep2))	571.312	-1.29526
509.312	[M-H]-	C28H45O8	FA(28:2(OH4,Ke2,cyclo))	509.312	0.333784
523.292	[M-H]-	C28H43O9	FA(28:2(OH4,Ke2,Ep,cyclo))	523.291	1.01282
571.312	[M+Formate]-	C29H47O11	FA(28:2(OH4,Ke2,Ep))	571.312	-1.29526
573.246	[M+Cl]-	C28H42O10Cl	FA(28:2(OH4,Ke2,Ep2,cyclo))	573.247	-1.55256
511.327	[M-H]-	C28H47O8	FA(28:2(OH4,Ke2))	511.328	-0.645379
557.332	[M+Formate]-	C29H49O10	FA(28:2(OH4,Ke2))	557.333	-2.24282
491.301	[M-H]-	C28H43O7	FA(28:3(OH2,Ke,Ep2))	491.301	-0.590269
491.301	[M-H]-	C28H43O7	FA(28:3(OH2,Ke2,Ep))	491.301	-0.590269
491.301	[M-H]-	C28H43O7	FA(28:3(OH3,Ep2,cyclo))	491.301	-0.590269
491.301	[M-H]-	C28H43O7	FA(28:3(OH3,Ke,Ep,cyclo))	491.301	-0.590269
507.297	[M-H]-	C28H43O8	FA(28:3(OH3,Ke,Ep2))	507.296	0.216836
491.301	[M-H]-	C28H43O7	FA(28:3(OH3,Ke2,cyclo))	491.301	-0.590269
507.297	[M-H]-	C28H43O8	FA(28:3(OH3,Ke2,Ep))	507.296	0.216836
507.297	[M-H]-	C28H43O8	FA(28:3(OH4,Ep2,cyclo))	507.296	0.216836
509.312	[M-H]-	C28H45O8	FA(28:3(OH4,Ep2))	509.312	0.333784
507.297	[M-H]-	C28H43O8	FA(28:3(OH4,Ke,Ep,cyclo))	507.296	0.216836
509.312	[M-H]-	C28H45O8	FA(28:3(OH4,Ke,Ep))	509.312	0.333784
523.292	[M-H]-	C28H43O9	FA(28:3(OH4,Ke,Ep2))	523.291	1.01282
507.297	[M-H]-	C28H43O8	FA(28:3(OH4,Ke2,cyclo))	507.296	0.216836
523.292	[M-H]-	C28H43O9	FA(28:3(OH4,Ke2,Ep))	523.291	1.01282
581.262	[M+Formate]-	C29H41O12	FA(28:3(OH4,Ke2,Ep2,cyclo))	581.26	2.27093
573.246	[M+Cl]-	C28H42O10Cl	FA(28:3(OH4,Ke2,Ep2))	573.247	-1.55256
509.312	[M-H]-	C28H45O8	FA(28:3(OH4,Ke2))	509.312	0.333784
501.25	[M-H]-	C28H37O8	FA(28:4(OH2,Ke2,Ep2,cyclo))	501.249	1.91521
491.301	[M-H]-	C28H43O7	FA(28:4(OH3,Ep2))	491.301	-0.590269
491.301	[M-H]-	C28H43O7	FA(28:4(OH3,Ke,Ep))	491.301	-0.590269
491.301	[M-H]-	C28H43O7	FA(28:4(OH3,Ke2))	491.301	-0.590269
491.301	[M-H]-	C28H43O7	FA(28:4(OH4,Ep,cyclo))	491.301	-0.590269
507.297	[M-H]-	C28H43O8	FA(28:4(OH4,Ep2))	507.296	0.216836
491.301	[M-H]-	C28H43O7	FA(28:4(OH4,Ke,cyclo))	491.301	-0.590269
507.297	[M-H]-	C28H43O8	FA(28:4(OH4,Ke,Ep))	507.296	0.216836
579.245	[M+Formate]-	C29H39O12	FA(28:4(OH4,Ke2,Ep2,cyclo))	579.245	1.22573
581.262	[M+Formate]-	C29H41O12	FA(28:4(OH4,Ke2,Ep2))	581.26	2.27093
507.297	[M-H]-	C28H43O8	FA(28:4(OH4,Ke2))	507.296	0.216836
453.264	[M-H]-	C28H37O5	FA(28:5(Ke,Ep2,cyclo))	453.265	-1.14723
453.264	[M-H]-	C28H37O5	FA(28:5(Ke2,Ep,cyclo))	453.265	-1.14723
501.25	[M-H]-	C28H37O8	FA(28:5(OH2,Ke2,Ep2))	501.249	1.91521
501.25	[M-H]-	C28H37O8	FA(28:5(OH3,Ke,Ep2,cyclo))	501.249	1.91521
501.25	[M-H]-	C28H37O8	FA(28:5(OH3,Ke2,Ep,cyclo))	501.249	1.91521
491.301	[M-H]-	C28H43O7	FA(28:5(OH4,Ep))	491.301	-0.590269
491.301	[M-H]-	C28H43O7	FA(28:5(OH4,Ke))	491.301	-0.590269
577.229	[M+Formate]-	C29H37O12	FA(28:5(OH4,Ke2,Ep2,cyclo))	577.229	0.103945
579.245	[M+Formate]-	C29H39O12	FA(28:5(OH4,Ke2,Ep2))	579.245	1.22573
453.264	[M-H]-	C28H37O5	FA(28:6(Ke,Ep2))	453.265	-1.14723
453.264	[M-H]-	C28H37O5	FA(28:6(Ke2,Ep))	453.265	-1.14723
453.264	[M-H]-	C28H37O5	FA(28:6(OH,Ep2,cyclo))	453.265	-1.14723
453.264	[M-H]-	C28H37O5	FA(28:6(OH,Ke,Ep,cyclo))	453.265	-1.14723
453.264	[M-H]-	C28H37O5	FA(28:6(OH,Ke2,cyclo))	453.265	-1.14723
501.25	[M-H]-	C28H37O8	FA(28:6(OH3,Ke,Ep2))	501.249	1.91521
501.25	[M-H]-	C28H37O8	FA(28:6(OH3,Ke2,Ep))	501.249	1.91521
501.25	[M-H]-	C28H37O8	FA(28:6(OH4,Ep2,cyclo))	501.249	1.91521
501.25	[M-H]-	C28H37O8	FA(28:6(OH4,Ke,Ep,cyclo))	501.249	1.91521
501.25	[M-H]-	C28H37O8	FA(28:6(OH4,Ke2,cyclo))	501.249	1.91521
577.229	[M+Formate]-	C29H37O12	FA(28:6(OH4,Ke2,Ep2))	577.229	0.103945
495.442	[M+Formate]-	C31H59O4	FA(30:0(cyclo))	495.442	-0.544968
481.426	[M-H]-	C30H57O4	FA(30:0(OH,Ep))	481.426	-0.0623148
481.426	[M-H]-	C30H57O4	FA(30:0(OH,Ke))	481.426	-0.0623148
481.426	[M-H]-	C30H57O4	FA(30:0(OH2,cyclo))	481.426	-0.0623148
573.321	[M+Cl]-	C30H50O8Cl	FA(30:0(OH2,Ke2,Ep2,cyclo))	573.32	1.72678
527.396	[M-H]-	C30H55O7	FA(30:0(OH3,Ep2))	527.395	0.492989
527.396	[M-H]-	C30H55O7	FA(30:0(OH3,Ke,Ep))	527.395	0.492989
527.396	[M-H]-	C30H55O7	FA(30:0(OH3,Ke2))	527.395	0.492989
527.396	[M-H]-	C30H55O7	FA(30:0(OH4,Ep,cyclo))	527.395	0.492989
527.396	[M-H]-	C30H55O7	FA(30:0(OH4,Ke,cyclo))	527.395	0.492989
615.339	[M+Formate]-	C31H51O12	FA(30:0(OH4,Ke2,Ep2,cyclo))	615.339	0.243768
451.452	[M-H]-	C30H59O2	FA(30:0)	451.452	-0.531618
571.305	[M+Cl]-	C30H48O8Cl	FA(30:1(OH2,Ke2,Ep2,cyclo))	571.304	1.89041
573.321	[M+Cl]-	C30H50O8Cl	FA(30:1(OH2,Ke2,Ep2))	573.32	1.72678
481.426	[M-H]-	C30H57O4	FA(30:1(OH2))	481.426	-0.0623148
573.321	[M+Cl]-	C30H50O8Cl	FA(30:1(OH3,Ke,Ep2,cyclo))	573.32	1.72678
573.321	[M+Cl]-	C30H50O8Cl	FA(30:1(OH3,Ke2,Ep,cyclo))	573.32	1.72678
527.396	[M-H]-	C30H55O7	FA(30:1(OH4,Ep))	527.395	0.492989
527.396	[M-H]-	C30H55O7	FA(30:1(OH4,Ke))	527.395	0.492989
615.339	[M+Formate]-	C31H51O12	FA(30:1(OH4,Ke2,Ep2))	615.339	0.243768
495.442	[M+Formate]-	C31H59O4	FA(30:1)	495.442	-0.544968
571.305	[M+Cl]-	C30H48O8Cl	FA(30:2(OH2,Ke2,Ep2))	571.304	1.89041
571.305	[M+Cl]-	C30H48O8Cl	FA(30:2(OH3,Ke,Ep2,cyclo))	571.304	1.89041
573.321	[M+Cl]-	C30H50O8Cl	FA(30:2(OH3,Ke,Ep2))	573.32	1.72678
571.305	[M+Cl]-	C30H48O8Cl	FA(30:2(OH3,Ke2,Ep,cyclo))	571.304	1.89041
573.321	[M+Cl]-	C30H50O8Cl	FA(30:2(OH3,Ke2,Ep))	573.32	1.72678
573.321	[M+Cl]-	C30H50O8Cl	FA(30:2(OH4,Ep2,cyclo))	573.32	1.72678
573.321	[M+Cl]-	C30H50O8Cl	FA(30:2(OH4,Ke,Ep,cyclo))	573.32	1.72678
573.321	[M+Cl]-	C30H50O8Cl	FA(30:2(OH4,Ke2,cyclo))	573.32	1.72678
571.305	[M+Cl]-	C30H48O8Cl	FA(30:3(OH3,Ke,Ep2))	571.304	1.89041
571.305	[M+Cl]-	C30H48O8Cl	FA(30:3(OH3,Ke2,Ep))	571.304	1.89041
571.305	[M+Cl]-	C30H48O8Cl	FA(30:3(OH4,Ep2,cyclo))	571.304	1.89041
573.321	[M+Cl]-	C30H50O8Cl	FA(30:3(OH4,Ep2))	573.32	1.72678
571.305	[M+Cl]-	C30H48O8Cl	FA(30:3(OH4,Ke,Ep,cyclo))	571.304	1.89041
573.321	[M+Cl]-	C30H50O8Cl	FA(30:3(OH4,Ke,Ep))	573.32	1.72678
571.305	[M+Cl]-	C30H48O8Cl	FA(30:3(OH4,Ke2,cyclo))	571.304	1.89041
573.321	[M+Cl]-	C30H50O8Cl	FA(30:3(OH4,Ke2))	573.32	1.72678
571.305	[M+Cl]-	C30H48O8Cl	FA(30:4(OH4,Ep2))	571.304	1.89041
571.305	[M+Cl]-	C30H48O8Cl	FA(30:4(OH4,Ke,Ep))	571.304	1.89041
571.305	[M+Cl]-	C30H48O8Cl	FA(30:4(OH4,Ke2))	571.304	1.89041
523.473	[M+Formate]-	C33H63O4	FA(32:0(cyclo))	523.473	0.382063
509.458	[M-H]-	C32H61O4	FA(32:0(OH,Ep))	509.457	0.196287
509.458	[M-H]-	C32H61O4	FA(32:0(OH,Ke))	509.457	0.196287
509.458	[M-H]-	C32H61O4	FA(32:0(OH2,cyclo))	509.457	0.196287
613.397	[M+Formate]-	C33H57O10	FA(32:0(OH2,Ke2,Ep2))	613.396	2.02153
613.397	[M+Formate]-	C33H57O10	FA(32:0(OH3,Ke,Ep2,cyclo))	613.396	2.02153
613.397	[M+Formate]-	C33H57O10	FA(32:0(OH3,Ke2,Ep,cyclo))	613.396	2.02153
479.483	[M-H]-	C32H63O2	FA(32:0)	479.483	-0.813375
509.458	[M-H]-	C32H61O4	FA(32:1(OH2))	509.457	0.196287
613.397	[M+Formate]-	C33H57O10	FA(32:1(OH3,Ke,Ep2))	613.396	2.02153
613.397	[M+Formate]-	C33H57O10	FA(32:1(OH3,Ke2,Ep))	613.396	2.02153
613.397	[M+Formate]-	C33H57O10	FA(32:1(OH4,Ep2,cyclo))	613.396	2.02153
613.397	[M+Formate]-	C33H57O10	FA(32:1(OH4,Ke,Ep,cyclo))	613.396	2.02153
613.397	[M+Formate]-	C33H57O10	FA(32:1(OH4,Ke2,cyclo))	613.396	2.02153
523.473	[M+Formate]-	C33H63O4	FA(32:1)	523.473	0.382063
613.397	[M+Formate]-	C33H57O10	FA(32:2(OH4,Ep2))	613.396	2.02153
613.397	[M+Formate]-	C33H57O10	FA(32:2(OH4,Ke,Ep))	613.396	2.02153
613.397	[M+Formate]-	C33H57O10	FA(32:2(OH4,Ke2))	613.396	2.02153
577.294	[M+Cl]-	C32H46O7Cl	FA(32:4(OH,Ke2,Ep2,cyclo))	577.294	0.121255
619.311	[M+Formate]-	C33H47O11	FA(32:4(OH3,Ke2,Ep2,cyclo))	619.312	-2.72883
577.294	[M+Cl]-	C32H46O7Cl	FA(32:5(OH,Ke2,Ep2))	577.294	0.121255
577.294	[M+Cl]-	C32H46O7Cl	FA(32:5(OH2,Ke,Ep2,cyclo))	577.294	0.121255
577.294	[M+Cl]-	C32H46O7Cl	FA(32:5(OH2,Ke2,Ep,cyclo))	577.294	0.121255
619.311	[M+Formate]-	C33H47O11	FA(32:5(OH3,Ke2,Ep2))	619.312	-2.72883
619.311	[M+Formate]-	C33H47O11	FA(32:5(OH4,Ke,Ep2,cyclo))	619.312	-2.72883
619.311	[M+Formate]-	C33H47O11	FA(32:5(OH4,Ke2,Ep,cyclo))	619.312	-2.72883
577.294	[M+Cl]-	C32H46O7Cl	FA(32:6(OH2,Ke,Ep2))	577.294	0.121255
577.294	[M+Cl]-	C32H46O7Cl	FA(32:6(OH2,Ke2,Ep))	577.294	0.121255
577.294	[M+Cl]-	C32H46O7Cl	FA(32:6(OH3,Ep2,cyclo))	577.294	0.121255
577.294	[M+Cl]-	C32H46O7Cl	FA(32:6(OH3,Ke,Ep,cyclo))	577.294	0.121255
577.294	[M+Cl]-	C32H46O7Cl	FA(32:6(OH3,Ke2,cyclo))	577.294	0.121255
619.311	[M+Formate]-	C33H47O11	FA(32:6(OH4,Ke,Ep2))	619.312	-2.72883
619.311	[M+Formate]-	C33H47O11	FA(32:6(OH4,Ke2,Ep))	619.312	-2.72883
535.473	[M-H]-	C34H63O4	FA(34:0(Ep2))	535.473	0.410852
535.473	[M-H]-	C34H63O4	FA(34:0(Ke,Ep))	535.473	0.410852
535.473	[M-H]-	C34H63O4	FA(34:0(Ke2))	535.473	0.410852
535.473	[M-H]-	C34H63O4	FA(34:0(OH,Ep,cyclo))	535.473	0.410852
537.489	[M-H]-	C34H65O4	FA(34:0(OH,Ep))	537.489	0
535.473	[M-H]-	C34H63O4	FA(34:0(OH,Ke,cyclo))	535.473	0.410852
537.489	[M-H]-	C34H65O4	FA(34:0(OH,Ke))	537.489	0
537.489	[M-H]-	C34H65O4	FA(34:0(OH2,cyclo))	537.489	0
507.515	[M-H]-	C34H67O2	FA(34:0)	507.515	-0.0591116
535.473	[M-H]-	C34H63O4	FA(34:1(OH,Ep))	535.473	0.410852
535.473	[M-H]-	C34H63O4	FA(34:1(OH,Ke))	535.473	0.410852
535.473	[M-H]-	C34H63O4	FA(34:1(OH2,cyclo))	535.473	0.410852
537.489	[M-H]-	C34H65O4	FA(34:1(OH2))	537.489	0
535.473	[M-H]-	C34H63O4	FA(34:2(OH2))	535.473	0.410852
648.425	[M+Cl]-	C34H63NO8Cl	HexCer(d28:2)	648.425	-0.138798
758.535	[M+Cl]-	C42H77NO8Cl	HexCer(d36:3)	758.534	0.777816
692.451	[M+Cl]-	C36H67NO9Cl	HexCer(t30:2)	692.451	-0.577658
776.545	[M+Cl]-	C42H79NO9Cl	HexCer(t36:2)	776.545	-0.386327
540.331	[M+Cl]-	C26H51NO8Cl	HexSph(t20:1)	540.331	-0.444172
812.492	[M+Cl]-	C40H75NO13Cl	LacCer(d28:1)	812.493	-1.31693
880.601	[M+Formate]-	C45H86NO15	LacCer(d32:0)	880.6	0.806268
908.633	[M+Formate]-	C47H90NO15	LacCer(d34:0)	908.632	1.34268
936.664	[M+Formate]-	C49H94NO15	LacCer(d36:0)	936.663	1.31317
840.531	[M+Formate]-	C41H78NO16	LacCer(t28:0)	840.533	-1.62992
868.563	[M+Formate]-	C43H82NO16	LacCer(t30:0)	868.564	-1.27797
409.236	[M-H]-	C19H38O7P	LPA(16:0)	409.236	0.390972
509.288	[M+Formate]-	C24H46O9P	LPA(20:1)	509.288	-0.157082
507.273	[M+Formate]-	C24H44O9P	LPA(20:2)	507.273	0.453405
540.331	[M+Formate]-	C25H51NO9P	LPC(16:0)	540.331	-0.0740287
538.315	[M+Formate]-	C25H49NO9P	LPC(16:1)	538.315	0.0743059
558.333	[M+Cl]-	C26H54NO7PCl	LPC(18:0)	558.333	-0.376119
568.362	[M+Formate]-	C27H55NO9P	LPC(18:0)	568.362	0.123161
556.317	[M+Cl]-	C26H52NO7PCl	LPC(18:1)	556.318	-0.251655
566.346	[M+Formate]-	C27H53NO9P	LPC(18:1)	566.346	-0.47674
596.392	[M+Formate]-	C29H59NO9P	LPC(20:0)	596.393	-1.91149
648.425	[M+Formate]-	C33H63NO9P	LPC(24:2)	648.425	0.169642
644.393	[M+Formate]-	C33H59NO9P	LPC(24:4)	644.393	-0.341406
642.379	[M+Formate]-	C33H57NO9P	LPC(24:5)	642.378	2.1327
754.503	[M+Formate]-	C41H73NO9P	LPC(32:5)	754.503	0.410867
782.535	[M+Formate]-	C43H77NO9P	LPC(34:5)	782.534	0.575055
780.519	[M+Formate]-	C43H75NO9P	LPC(34:6)	780.519	0.884028
452.278	[M-H]-	C21H43NO7P	LPE(16:0)	452.278	-0.0884411
450.263	[M-H]-	C21H41NO7P	LPE(16:1)	450.263	0.31093
524.299	[M+Formate]-	C24H47NO9P	LPE(18:1)	524.299	-0.24795
544.268	[M+Formate]-	C26H43NO9P	LPE(20:5)	544.268	-0.202106
578.347	[M+Formate]-	C28H53NO9P	LPE(22:2)	578.346	0.881824
606.378	[M+Formate]-	C30H57NO9P	LPE(24:2)	606.378	0.511233
634.409	[M+Formate]-	C32H61NO9P	LPE(26:2)	634.409	-0.283729
662.44	[M+Formate]-	C34H65NO9P	LPE(28:2)	662.44	-0.996316
688.456	[M+Formate]-	C36H67NO9P	LPE(30:3)	688.456	-0.0145253
684.426	[M+Formate]-	C36H63NO9P	LPE(30:5)	684.425	2.46923
750.565	[M+Formate]-	C40H81NO9P	LPE(34:0)	750.566	-0.452992
509.288	[M-H]-	C24H46O9P	LPG(18:1)	509.288	-0.157082
507.273	[M-H]-	C24H44O9P	LPG(18:2)	507.273	0.453405
751.514	[M+Formate]-	C39H76O11P	LPG(32:1)	751.513	1.09113
599.32	[M-H]-	C27H52O12P	LPI(18:0)	599.32	0.350397
811.496	[M+Formate]-	C40H76O14P	LPI(30:1)	811.498	-1.78682
839.53	[M+Formate]-	C42H80O14P	LPI(32:1)	839.529	0.571749
524.299	[M-H]-	C24H47NO9P	LPS(18:0)	524.299	-0.24795
544.268	[M-H]-	C26H43NO9P	LPS(20:4)	544.268	-0.202106
578.347	[M-H]-	C28H53NO9P	LPS(22:1)	578.346	0.881824
606.378	[M-H]-	C30H57NO9P	LPS(24:1)	606.378	0.511233
634.409	[M-H]-	C32H61NO9P	LPS(26:1)	634.409	-0.283729
680.414	[M+Formate]-	C33H63NO11P	LPS(26:1)	680.414	-0.102878
662.44	[M-H]-	C34H65NO9P	LPS(28:1)	662.44	-0.996316
688.456	[M-H]-	C36H67NO9P	LPS(30:2)	688.456	-0.0145253
684.426	[M-H]-	C36H63NO9P	LPS(30:4)	684.425	2.46923
784.477	[M+Formate]-	C41H71NO11P	LPS(34:5)	784.477	0.484399
401.291	[M+Formate]-	C22H41O6	MG(18:1)	401.291	-0.0747587
411.348	[M-H]-	C25H47O4	MG(22:1)	411.348	0.461896
447.275	[M+Formate]-	C26H39O6	MG(22:6)	447.275	0.245934
439.379	[M-H]-	C27H51O4	MG(24:1)	439.379	-0.978653
433.332	[M-H]-	C27H45O4	MG(24:4)	433.332	-0.0692309
453.395	[M-H]-	C28H53O4	MG(25:1)	453.395	-0.617563
467.411	[M-H]-	C29H55O4	MG(26:1)	467.411	0.0213945
495.442	[M-H]-	C31H59O4	MG(28:1)	495.442	-0.544968
523.473	[M-H]-	C33H63O4	MG(30:1)	523.473	0.382063
561.365	[M-H]-	C29H53O10	MGDG(20:0)	561.364	1.88826
557.332	[M-H]-	C29H49O10	MGDG(20:2)	557.333	-2.24282
613.397	[M-H]-	C33H57O10	MGDG(24:2)	613.396	2.02153
479.278	[M-H]-	C23H44O8P	PA(20:0)	479.278	0.3547
569.31	[M+Formate]-	C26H50O11P	PA(22:0(OH))	569.31	0.720171
671.466	[M-H]-	C37H68O8P	PA(34:2)	671.466	0.208499
747.518	[M+Formate]-	C40H76O10P	PA(36:1)	747.518	-0.361195
745.502	[M+Formate]-	C40H74O10P	PA(36:2)	745.503	-0.10731
671.466	[M-H]-	C37H68O8P	PA(O-34:3(OH))	671.466	0.208499
747.518	[M+Formate]-	C40H76O10P	PA(O-36:2(OH))	747.518	-0.361195
745.502	[M+Formate]-	C40H74O10P	PA(O-36:3(OH))	745.503	-0.10731
671.466	[M-H]-	C37H68O8P	PA(P-34:2(OH))	671.466	0.208499
747.518	[M+Formate]-	C40H76O10P	PA(P-36:1(OH))	747.518	-0.361195
745.502	[M+Formate]-	C40H74O10P	PA(P-36:2(OH))	745.503	-0.10731
680.414	[M+Formate]-	C33H63NO11P	PC(24:1(OH))	680.414	-0.102878
692.451	[M+Formate]-	C35H67NO10P	PC(26:1)	692.451	-0.288829
738.484	[M+Cl]-	C38H74NO8PCl	PC(30:1)	738.485	-1.02913
766.515	[M+Cl]-	C40H78NO8PCl	PC(32:1)	766.516	-1.73512
776.545	[M+Formate]-	C41H79NO10P	PC(32:1)	776.545	-0.128776
784.477	[M+Formate]-	C41H71NO11P	PC(32:5(OH))	784.477	0.484399
794.547	[M+Cl]-	C42H82NO8PCl	PC(34:1)	794.547	0.113272
808.525	[M+Cl]-	C42H80NO9PCl	PC(34:2(OH))	808.527	-1.34813
790.515	[M+Cl]-	C42H78NO8PCl	PC(34:3)	790.516	-0.657798
800.545	[M+Formate]-	C43H79NO10P	PC(34:3)	800.545	-0.162389
798.529	[M+Formate]-	C43H77NO10P	PC(34:4)	798.529	-0.475875
810.493	[M+Formate]-	C43H73NO11P	PC(34:6(OH))	810.493	0.246763
846.587	[M+Formate]-	C45H85NO11P	PC(36:2(OH))	846.587	0.153558
820.563	[M+Cl]-	C44H84NO8PCl	PC(36:2)	820.563	-0.438723
830.591	[M+Formate]-	C45H85NO10P	PC(36:2)	830.592	-0.577901
818.546	[M+Cl]-	C44H82NO8PCl	PC(36:3)	818.547	-1.57596
816.531	[M+Cl]-	C44H80NO8PCl	PC(36:4)	816.532	-1.00425
824.544	[M+Formate]-	C45H79NO10P	PC(36:5)	824.545	-0.327453
874.618	[M+Formate]-	C47H89NO11P	PC(38:2(OH))	874.618	-0.0686014
856.609	[M+Formate]-	C47H87NO10P	PC(38:3)	856.607	1.84449
870.586	[M+Formate]-	C47H85NO11P	PC(38:4(OH))	870.587	-0.643244
844.562	[M+Cl]-	C46H84NO8PCl	PC(38:4)	844.563	-1.56294
854.591	[M+Formate]-	C47H85NO10P	PC(38:4)	854.592	-0.46806
852.578	[M+Formate]-	C47H83NO10P	PC(38:5)	852.576	1.86494
840.531	[M+Cl]-	C46H80NO8PCl	PC(38:6)	840.532	-0.440198
850.56	[M+Formate]-	C47H81NO10P	PC(38:6)	850.56	-0.646633
898.618	[M+Formate]-	C49H89NO11P	PC(40:4(OH))	898.618	0.222564
894.585	[M+Formate]-	C49H85NO11P	PC(40:6(OH))	894.587	-2.02328
868.563	[M+Cl]-	C48H84NO8PCl	PC(40:6)	868.563	-0.126646
878.591	[M+Formate]-	C49H85NO10P	PC(40:6)	878.592	-1.02437
794.547	[M+Cl]-	C42H82NO8PCl	PC(O-34:2(OH))	794.547	0.113272
790.515	[M+Cl]-	C42H78NO8PCl	PC(O-34:4(OH))	790.516	-0.657798
800.545	[M+Formate]-	C43H79NO10P	PC(O-34:4(OH))	800.545	-0.162389
820.563	[M+Cl]-	C44H84NO8PCl	PC(O-36:3(OH))	820.563	-0.438723
830.591	[M+Formate]-	C45H85NO10P	PC(O-36:3(OH))	830.592	-0.577901
818.546	[M+Cl]-	C44H82NO8PCl	PC(O-36:4(OH))	818.547	-1.57596
816.531	[M+Cl]-	C44H80NO8PCl	PC(O-36:5(OH))	816.532	-1.00425
856.609	[M+Formate]-	C47H87NO10P	PC(O-38:4(OH))	856.607	1.84449
844.562	[M+Cl]-	C46H84NO8PCl	PC(O-38:5(OH))	844.563	-1.56294
854.591	[M+Formate]-	C47H85NO10P	PC(O-38:5(OH))	854.592	-0.46806
852.578	[M+Formate]-	C47H83NO10P	PC(O-38:6(OH))	852.576	1.86494
738.484	[M+Cl]-	C38H74NO8PCl	PC(P-30:1(OH))	738.485	-1.02913
766.515	[M+Cl]-	C40H78NO8PCl	PC(P-32:1(OH))	766.516	-1.73512
776.545	[M+Formate]-	C41H79NO10P	PC(P-32:1(OH))	776.545	-0.128776
794.547	[M+Cl]-	C42H82NO8PCl	PC(P-34:1(OH))	794.547	0.113272
790.515	[M+Cl]-	C42H78NO8PCl	PC(P-34:3(OH))	790.516	-0.657798
800.545	[M+Formate]-	C43H79NO10P	PC(P-34:3(OH))	800.545	-0.162389
798.529	[M+Formate]-	C43H77NO10P	PC(P-34:4(OH))	798.529	-0.475875
782.535	[M+Formate]-	C43H77NO9P	PC(P-34:4)	782.534	0.575055
820.563	[M+Cl]-	C44H84NO8PCl	PC(P-36:2(OH))	820.563	-0.438723
830.591	[M+Formate]-	C45H85NO10P	PC(P-36:2(OH))	830.592	-0.577901
818.546	[M+Cl]-	C44H82NO8PCl	PC(P-36:3(OH))	818.547	-1.57596
816.531	[M+Cl]-	C44H80NO8PCl	PC(P-36:4(OH))	816.532	-1.00425
824.544	[M+Formate]-	C45H79NO10P	PC(P-36:5(OH))	824.545	-0.327453
856.609	[M+Formate]-	C47H87NO10P	PC(P-38:3(OH))	856.607	1.84449
844.562	[M+Cl]-	C46H84NO8PCl	PC(P-38:4(OH))	844.563	-1.56294
854.591	[M+Formate]-	C47H85NO10P	PC(P-38:4(OH))	854.592	-0.46806
852.578	[M+Formate]-	C47H83NO10P	PC(P-38:5(OH))	852.576	1.86494
840.531	[M+Cl]-	C46H80NO8PCl	PC(P-38:6(OH))	840.532	-0.440198
850.56	[M+Formate]-	C47H81NO10P	PC(P-38:6(OH))	850.56	-0.646633
868.563	[M+Cl]-	C48H84NO8PCl	PC(P-40:6(OH))	868.563	-0.126646
878.591	[M+Formate]-	C49H85NO10P	PC(P-40:6(OH))	878.592	-1.02437
880.601	[M+Cl]-	C50H88NO7PCl	PC(P-42:6)	880.599	1.94186
908.633	[M+Cl]-	C52H92NO7PCl	PC(P-44:6)	908.631	2.44324
936.664	[M+Cl]-	C54H96NO7PCl	PC(P-46:6)	936.662	2.3808
538.315	[M-H]-	C25H49NO9P	PE(20:0(OH))	538.315	0.0743059
566.346	[M-H]-	C27H53NO9P	PE(22:0(OH))	566.346	-0.47674
638.367	[M+Formate]-	C30H57NO11P	PE(24:1(OH))	638.367	-1.23753
666.399	[M+Formate]-	C32H61NO11P	PE(26:1(OH))	666.399	-0.0900362
650.404	[M+Formate]-	C32H61NO10P	PE(26:1)	650.404	0.307501
648.425	[M-H]-	C33H63NO9P	PE(28:1(OH))	648.425	0.169642
684.402	[M+Cl]-	C33H64NO9PCl	PE(28:1(OH))	684.401	0.540618
694.43	[M+Formate]-	C34H65NO11P	PE(28:1(OH))	694.43	-0.48961
678.435	[M+Formate]-	C34H65NO10P	PE(28:1)	678.435	-0.810689
692.414	[M+Formate]-	C34H63NO11P	PE(28:2(OH))	692.414	-0.245518
644.393	[M-H]-	C33H59NO9P	PE(28:3(OH))	644.393	-0.341406
690.399	[M+Formate]-	C34H61NO11P	PE(28:3(OH))	690.399	0.275203
642.379	[M-H]-	C33H57NO9P	PE(28:4(OH))	642.378	2.1327
722.461	[M+Formate]-	C36H69NO11P	PE(30:1(OH))	722.461	-0.387564
720.447	[M+Formate]-	C36H67NO11P	PE(30:2(OH))	720.446	1.16594
704.451	[M+Formate]-	C36H67NO10P	PE(30:2)	704.451	0.3123
688.493	[M-H]-	C37H71NO8P	PE(32:1)	688.492	0.537406
732.482	[M+Formate]-	C38H71NO10P	PE(32:2)	732.482	0.177479
728.451	[M+Formate]-	C38H67NO10P	PE(32:4)	728.451	0.590294
714.508	[M-H]-	C39H73NO8P	PE(34:2)	714.508	-0.209935
712.492	[M-H]-	C39H71NO8P	PE(34:3)	712.492	-0.407022
758.535	[M-H]-	C41H77NO9P	PE(36:2(OH))	758.534	0.909649
742.539	[M-H]-	C41H77NO8P	PE(36:2)	742.539	-0.121206
754.503	[M-H]-	C41H73NO9P	PE(36:4(OH))	754.503	0.410867
736.492	[M-H]-	C41H71NO8P	PE(36:5)	736.492	0.203668
782.498	[M+Formate]-	C42H73NO10P	PE(36:5)	782.498	0.434506
782.535	[M-H]-	C43H77NO9P	PE(38:4(OH))	782.534	0.575055
766.539	[M-H]-	C43H77NO8P	PE(38:4)	766.539	-0.182639
780.519	[M-H]-	C43H75NO9P	PE(38:5(OH))	780.519	0.884028
764.524	[M-H]-	C43H75NO8P	PE(38:5)	764.524	-0.0784802
810.53	[M+Formate]-	C44H77NO10P	PE(38:5)	810.529	1.09805
806.497	[M+Formate]-	C44H73NO10P	PE(38:7)	806.498	-0.607565
790.539	[M-H]-	C45H77NO8P	PE(40:6)	790.539	-0.202394
834.53	[M+Formate]-	C46H77NO10P	PE(40:7)	834.529	1.03052
856.511	[M+Formate]-	C48H75NO10P	PE(42:10)	856.513	-2.67363
750.565	[M+Formate]-	C40H81NO9P	PE(O-34:0)	750.566	-0.452992
714.508	[M-H]-	C39H73NO8P	PE(O-34:3(OH))	714.508	-0.209935
712.492	[M-H]-	C39H71NO8P	PE(O-34:4(OH))	712.492	-0.407022
776.581	[M+Formate]-	C42H83NO9P	PE(O-36:1)	776.581	-0.321924
774.566	[M+Formate]-	C42H81NO9P	PE(O-36:2)	774.566	0
742.539	[M-H]-	C41H77NO8P	PE(O-36:3(OH))	742.539	-0.121206
798.565	[M+Formate]-	C44H81NO9P	PE(O-38:4)	798.566	-1.05189
766.539	[M-H]-	C43H77NO8P	PE(O-38:5(OH))	766.539	-0.182639
764.524	[M-H]-	C43H75NO8P	PE(O-38:6(OH))	764.524	-0.0784802
810.53	[M+Formate]-	C44H77NO10P	PE(O-38:6(OH))	810.529	1.09805
688.493	[M-H]-	C37H71NO8P	PE(P-32:1(OH))	688.492	0.537406
714.508	[M-H]-	C39H73NO8P	PE(P-34:2(OH))	714.508	-0.209935
712.492	[M-H]-	C39H71NO8P	PE(P-34:3(OH))	712.492	-0.407022
776.581	[M+Formate]-	C42H83NO9P	PE(P-36:0)	776.581	-0.321924
774.566	[M+Formate]-	C42H81NO9P	PE(P-36:1)	774.566	0
742.539	[M-H]-	C41H77NO8P	PE(P-36:2(OH))	742.539	-0.121206
736.492	[M-H]-	C41H71NO8P	PE(P-36:5(OH))	736.492	0.203668
782.498	[M+Formate]-	C42H73NO10P	PE(P-36:5(OH))	782.498	0.434506
798.565	[M+Formate]-	C44H81NO9P	PE(P-38:3)	798.566	-1.05189
766.539	[M-H]-	C43H77NO8P	PE(P-38:4(OH))	766.539	-0.182639
764.524	[M-H]-	C43H75NO8P	PE(P-38:5(OH))	764.524	-0.0784802
810.53	[M+Formate]-	C44H77NO10P	PE(P-38:5(OH))	810.529	1.09805
790.539	[M-H]-	C45H77NO8P	PE(P-40:6(OH))	790.539	-0.202394
569.31	[M-H]-	C26H50O11P	PG(20:0(OH))	569.31	0.720171
599.32	[M+Formate]-	C27H52O12P	PG(20:0)	599.32	0.350397
811.532	[M+Formate]-	C41H80O13P	PG(34:0(OH))	811.534	-2.18105
747.518	[M-H]-	C40H76O10P	PG(34:1)	747.518	-0.361195
745.502	[M-H]-	C40H74O10P	PG(34:2)	745.503	-0.10731
857.518	[M+Formate]-	C45H78O13P	PG(38:5(OH))	857.519	-0.67637
885.549	[M+Formate]-	C47H82O13P	PG(40:5(OH))	885.55	-0.496866
885.549	[M+Formate]-	C47H82O13P	PG(40:5(OH))	885.55	0.496866
883.534	[M+Formate]-	C47H80O13P	PG(40:6(OH))	883.534	-0.520636
923.651	[M+Cl]-	C50H97O10PCl	PG(44:1)	923.651	-0.855301
751.514	[M+Formate]-	C39H76O11P	PG(O-32:1)	751.513	1.09113
769.515	[M+Cl]-	C40H79O9PCl	PG(O-34:1)	769.516	-0.285894
747.518	[M-H]-	C40H76O10P	PG(O-34:2(OH))	747.518	-0.361195
745.502	[M-H]-	C40H74O10P	PG(O-34:3(OH))	745.503	-0.10731
923.651	[M+Cl]-	C50H97O10PCl	PG(O-44:2(OH))	923.651	-0.855301
751.514	[M+Formate]-	C39H76O11P	PG(P-32:0)	751.513	1.09113
769.515	[M+Cl]-	C40H79O9PCl	PG(P-34:0)	769.516	-0.285894
747.518	[M-H]-	C40H76O10P	PG(P-34:1(OH))	747.518	-0.361195
745.502	[M-H]-	C40H74O10P	PG(P-34:2(OH))	745.503	-0.10731
923.651	[M+Cl]-	C50H97O10PCl	PG(P-44:1(OH))	923.651	-0.855301
666.399	[M-H]-	C32H61NO11P	PI-Cer(d26:1)	666.399	-0.0900362
694.43	[M-H]-	C34H65NO11P	PI-Cer(d28:1)	694.43	-0.48961
692.414	[M-H]-	C34H63NO11P	PI-Cer(d28:2)	692.414	-0.245518
722.461	[M-H]-	C36H69NO11P	PI-Cer(d30:1)	722.461	-0.387564
720.447	[M-H]-	C36H67NO11P	PI-Cer(d30:2)	720.446	1.16594
838.501	[M+Cl]-	C42H78NO11PCl	PI-Cer(d36:3)	838.501	0.655933
812.492	[M+Formate]-	C39H75NO14P	PI-Cer(t32:1)	812.493	-1.07078
856.511	[M+Cl]-	C42H80NO12PCl	PI-Cer(t36:2)	856.511	-0.105077
857.518	[M-H]-	C45H78O13P	PI(36:4)	857.519	-0.67637
903.525	[M+Formate]-	C46H80O15P	PI(36:4)	903.524	0.69727
885.549	[M-H]-	C47H82O13P	PI(38:4)	885.55	-0.496866
885.549	[M-H]-	C47H82O13P	PI(38:4)	885.55	0.496866
883.534	[M-H]-	C47H80O13P	PI(38:5)	883.534	-0.520636
811.496	[M+Formate]-	C40H76O14P	PI(O-30:1)	811.498	-1.78682
811.532	[M-H]-	C41H80O13P	PI(O-32:0(OH))	811.534	-2.18105
839.53	[M+Formate]-	C42H80O14P	PI(O-32:1)	839.529	0.571749
857.518	[M-H]-	C45H78O13P	PI(O-36:5(OH))	857.519	-0.67637
903.525	[M+Formate]-	C46H80O15P	PI(O-36:5(OH))	903.524	0.69727
885.549	[M-H]-	C47H82O13P	PI(O-38:5(OH))	885.55	-0.496866
885.549	[M-H]-	C47H82O13P	PI(O-38:5(OH))	885.55	0.496866
883.534	[M-H]-	C47H80O13P	PI(O-38:6(OH))	883.534	-0.520636
811.496	[M+Formate]-	C40H76O14P	PI(P-30:0)	811.498	-1.78682
839.53	[M+Formate]-	C42H80O14P	PI(P-32:0)	839.529	0.571749
857.518	[M-H]-	C45H78O13P	PI(P-36:4(OH))	857.519	-0.67637
903.525	[M+Formate]-	C46H80O15P	PI(P-36:4(OH))	903.524	0.69727
885.549	[M-H]-	C47H82O13P	PI(P-38:4(OH))	885.55	-0.496866
885.549	[M-H]-	C47H82O13P	PI(P-38:4(OH))	885.55	0.496866
883.534	[M-H]-	C47H80O13P	PI(P-38:5(OH))	883.534	-0.520636
638.367	[M-H]-	C30H57NO11P	PS(24:0(OH))	638.367	-1.23753
666.399	[M-H]-	C32H61NO11P	PS(26:0(OH))	666.399	-0.0900362
650.404	[M-H]-	C32H61NO10P	PS(26:0)	650.404	0.307501
694.43	[M-H]-	C34H65NO11P	PS(28:0(OH))	694.43	-0.48961
678.435	[M-H]-	C34H65NO10P	PS(28:0)	678.435	-0.810689
692.414	[M-H]-	C34H63NO11P	PS(28:1(OH))	692.414	-0.245518
690.399	[M-H]-	C34H61NO11P	PS(28:2(OH))	690.399	0.275203
722.461	[M-H]-	C36H69NO11P	PS(30:0(OH))	722.461	-0.387564
720.447	[M-H]-	C36H67NO11P	PS(30:1(OH))	720.446	1.16594
704.451	[M-H]-	C36H67NO10P	PS(30:1)	704.451	0.3123
732.482	[M-H]-	C38H71NO10P	PS(32:1)	732.482	0.177479
728.451	[M-H]-	C38H67NO10P	PS(32:3)	728.451	0.590294
802.487	[M+Formate]-	C41H73NO12P	PS(34:3)	802.488	-0.423683
824.521	[M+Cl]-	C42H80NO10PCl	PS(36:1)	824.521	-0.89749
834.55	[M+Formate]-	C43H81NO12P	PS(36:1)	834.55	0.107843
838.501	[M+Cl]-	C42H78NO11PCl	PS(36:2(OH))	838.501	0.655933
830.519	[M+Formate]-	C43H77NO12P	PS(36:3)	830.519	0.0602033
782.498	[M-H]-	C42H73NO10P	PS(36:4)	782.498	0.434506
828.504	[M+Formate]-	C43H75NO12P	PS(36:4)	828.503	1.17079
862.582	[M+Formate]-	C45H85NO12P	PS(38:1)	862.582	0.324607
858.551	[M+Formate]-	C45H81NO12P	PS(38:3)	858.55	0.80368
810.53	[M-H]-	C44H77NO10P	PS(38:4)	810.529	1.09805
854.521	[M+Formate]-	C45H77NO12P	PS(38:5)	854.519	2.41071
806.497	[M-H]-	C44H73NO10P	PS(38:6)	806.498	-0.607565
882.553	[M+Formate]-	C47H81NO12P	PS(40:5)	882.55	2.66274
834.53	[M-H]-	C46H77NO10P	PS(40:6)	834.529	1.03052
856.511	[M-H]-	C48H75NO10P	PS(42:9)	856.513	-2.67363
802.487	[M+Formate]-	C41H73NO12P	PS(O-34:4(OH))	802.488	-0.423683
776.581	[M-H]-	C42H83NO9P	PS(O-36:0)	776.581	-0.321924
774.566	[M-H]-	C42H81NO9P	PS(O-36:1)	774.566	0
824.521	[M+Cl]-	C42H80NO10PCl	PS(O-36:2(OH))	824.521	-0.89749
834.55	[M+Formate]-	C43H81NO12P	PS(O-36:2(OH))	834.55	0.107843
808.525	[M+Cl]-	C42H80NO9PCl	PS(O-36:2)	808.527	-1.34813
830.519	[M+Formate]-	C43H77NO12P	PS(O-36:4(OH))	830.519	0.0602033
782.498	[M-H]-	C42H73NO10P	PS(O-36:5(OH))	782.498	0.434506
828.504	[M+Formate]-	C43H75NO12P	PS(O-36:5(OH))	828.503	1.17079
862.582	[M+Formate]-	C45H85NO12P	PS(O-38:2(OH))	862.582	0.324607
846.587	[M+Formate]-	C45H85NO11P	PS(O-38:2)	846.587	0.153558
798.565	[M-H]-	C44H81NO9P	PS(O-38:3)	798.566	-1.05189
858.551	[M+Formate]-	C45H81NO12P	PS(O-38:4(OH))	858.55	0.80368
810.53	[M-H]-	C44H77NO10P	PS(O-38:5(OH))	810.529	1.09805
854.521	[M+Formate]-	C45H77NO12P	PS(O-38:6(OH))	854.519	2.41071
874.618	[M+Formate]-	C47H89NO11P	PS(O-40:2)	874.618	-0.0686014
870.586	[M+Formate]-	C47H85NO11P	PS(O-40:4)	870.587	-0.643244
882.553	[M+Formate]-	C47H81NO12P	PS(O-40:6(OH))	882.55	2.66274
898.618	[M+Formate]-	C49H89NO11P	PS(O-42:4)	898.618	0.222564
894.585	[M+Formate]-	C49H85NO11P	PS(O-42:6)	894.587	-2.02328
650.404	[M-H]-	C32H61NO10P	PS(P-26:0(OH))	650.404	0.307501
634.409	[M-H]-	C32H61NO9P	PS(P-26:0)	634.409	-0.283729
680.414	[M+Formate]-	C33H63NO11P	PS(P-26:0)	680.414	-0.102878
678.435	[M-H]-	C34H65NO10P	PS(P-28:0(OH))	678.435	-0.810689
662.44	[M-H]-	C34H65NO9P	PS(P-28:0)	662.44	-0.996316
704.451	[M-H]-	C36H67NO10P	PS(P-30:1(OH))	704.451	0.3123
688.456	[M-H]-	C36H67NO9P	PS(P-30:1)	688.456	-0.0145253
732.482	[M-H]-	C38H71NO10P	PS(P-32:1(OH))	732.482	0.177479
802.487	[M+Formate]-	C41H73NO12P	PS(P-34:3(OH))	802.488	-0.423683
784.477	[M+Formate]-	C41H71NO11P	PS(P-34:4)	784.477	0.484399
774.566	[M-H]-	C42H81NO9P	PS(P-36:0)	774.566	0
824.521	[M+Cl]-	C42H80NO10PCl	PS(P-36:1(OH))	824.521	-0.89749
834.55	[M+Formate]-	C43H81NO12P	PS(P-36:1(OH))	834.55	0.107843
808.525	[M+Cl]-	C42H80NO9PCl	PS(P-36:1)	808.527	-1.34813
830.519	[M+Formate]-	C43H77NO12P	PS(P-36:3(OH))	830.519	0.0602033
782.498	[M-H]-	C42H73NO10P	PS(P-36:4(OH))	782.498	0.434506
828.504	[M+Formate]-	C43H75NO12P	PS(P-36:4(OH))	828.503	1.17079
810.493	[M+Formate]-	C43H73NO11P	PS(P-36:5)	810.493	0.246763
862.582	[M+Formate]-	C45H85NO12P	PS(P-38:1(OH))	862.582	0.324607
846.587	[M+Formate]-	C45H85NO11P	PS(P-38:1)	846.587	0.153558
798.565	[M-H]-	C44H81NO9P	PS(P-38:2)	798.566	-1.05189
858.551	[M+Formate]-	C45H81NO12P	PS(P-38:3(OH))	858.55	0.80368
810.53	[M-H]-	C44H77NO10P	PS(P-38:4(OH))	810.529	1.09805
854.521	[M+Formate]-	C45H77NO12P	PS(P-38:5(OH))	854.519	2.41071
806.497	[M-H]-	C44H73NO10P	PS(P-38:6(OH))	806.498	-0.607565
874.618	[M+Formate]-	C47H89NO11P	PS(P-40:1)	874.618	-0.0686014
870.586	[M+Formate]-	C47H85NO11P	PS(P-40:3)	870.587	-0.643244
882.553	[M+Formate]-	C47H81NO12P	PS(P-40:5(OH))	882.55	2.66274
834.53	[M-H]-	C46H77NO10P	PS(P-40:6(OH))	834.529	1.03052
898.618	[M+Formate]-	C49H89NO11P	PS(P-42:3)	898.618	0.222564
894.585	[M+Formate]-	C49H85NO11P	PS(P-42:5)	894.587	-2.02328
452.278	[M+Formate]-	C21H43NO7P	S1P(d20:1)	452.278	-0.0884411
450.263	[M+Formate]-	C21H41NO7P	S1P(d20:2)	450.263	0.31093
824.521	[M+Formate]-	C41H78NO13S	SHexCer(d34:1)	824.52	0.921749
684.402	[M-H]-	C32H62NO12S	SHexCer(t26:0)	684.4	2.73232
838.501	[M+Formate]-	C41H76NO14S	SHexCer(t34:2)	838.499	2.44484
737.536	[M+Cl]-	C39H79N2O6PCl	SM(d34:1)	737.537	-1.22028
411.348	[M+Formate]-	C25H47O4	WE(24:1)	411.348	0.461896
439.379	[M+Formate]-	C27H51O4	WE(26:1)	439.379	-0.978653
467.411	[M+Formate]-	C29H55O4	WE(28:1)	467.411	0.0213945
451.452	[M-H]-	C30H59O2	WE(30:0)	451.452	-0.531618
495.442	[M+Formate]-	C31H59O4	WE(30:1)	495.442	-0.544968
479.483	[M-H]-	C32H63O2	WE(32:0)	479.483	-0.813375
523.473	[M+Formate]-	C33H63O4	WE(32:1)	523.473	0.382063
507.515	[M-H]-	C34H67O2	WE(34:0)	507.515	-0.0591116

## Sheet: TableSI7_Summary
Lipid classes	MB	ML
CAR	1	2
Cer	1	10
CerP	1	4
DG	1	9
DGDG	0	1
FA	0	19
HexCer	0	3
HexSph	0	1
LacCer	2	4
LacSph	0	3
LPA	0	7
LPC	3	7
LPE	3	11
LPG	0	6
LPI	1	6
LPIP	0	3
LPS	3	12
MG	1	5
MGDG	0	9
MIPC	0	2
NAE	0	3
NAT	0	1
PA	0	6
PC	16	19
PE	15	16
PE-Cer	0	1
PG	1	14
PI	0	5
PI-Cer	1	4
PIP	0	2
PS	2	28
S1P	1	1
SHexCer	3	1
SHexSph	0	3
SM	2	4
SQDG	2	6
TG	1	9
WE	0	2
